# Supplementary material
Source: publisher figshare collection journal article supplement (https://diabetesjournals.figshare.com/ndownloader/files/29052033)
Supplement: Supplementary file 1 [file 29052033]

## Sheet: SIDD
Table S6 Lipids associated with each of the clusters
SIDD
Unadjusted model								Adjusted model
Variable	Effect	Lower	Upper	P-value	I2	Heterogeneity	P-value (FDR)	Effect	Lower	Upper	P-value	P-value (FDR)
SM 34:2;2	-0.27208	-0.390333	-0.153827	6.49673e-06	0	0.350094	0.00105247	-0.265121	-0.39257	-0.137672	4.5595e-05	0.00169422
PC O-16:1;0/18:1;0	-0.233218	-0.348424	-0.118013	7.25699e-05	0	0.224846	0.00395299	-0.0320438	-0.15616	0.0920727	0.612847	0.762052
PC 18:0;0_22:6;0	-0.26955	-0.404685	-0.134415	9.2491e-05	0.214055	0.110665	0.00395299	-0.256183	-0.383316	-0.129051	7.8314e-05	0.00169422
SM 34:0;2	-0.234135	-0.351908	-0.116363	9.76047e-05	0	0.294663	0.00395299	-0.267792	-0.395162	-0.140423	3.77556e-05	0.00169422
PC 18:0;0_20:3;0	-0.286815	-0.440345	-0.133284	0.000250777	0.384057	0.0715519	0.00812518	-0.29455	-0.480159	-0.108941	0.00186867	0.0153264
SM 38:2;2	-0.210715	-0.328888	-0.0925425	0.000474354	0	0.298094	0.0128075	-0.129072	-0.256632	-0.00151252	0.0473447	0.176766
CE 16:1;0	-0.207193	-0.325099	-0.0892866	0.000572784	0	0.441181	0.0132559	-0.25922	-0.386293	-0.132147	6.38306e-05	0.00169422
CE 20:2;0	0.205331	0.0870784	0.323584	0.000665928	0	0.844451	0.013485	0.261113	0.133407	0.38882	6.13899e-05	0.00169422
PC O-16:1;0/18:0;0	-0.194658	-0.312588	-0.0767283	0.00121571	0	0.33929	0.0218828	-0.191251	-0.318675	-0.0638265	0.00326409	0.0229906
LPC 16:1;0	-0.175007	-0.29507	-0.0549433	0.00427828	0.0340693	0.150168	0.0693081	-0.10368	-0.230749	0.0233896	0.109777	0.323344
LPE 18:1;0	0.169346	0.0515794	0.287112	0.00482649	0	0.541302	0.071081	0.143569	0.0161172	0.27102	0.027257	0.114546
CE 20:3;0	-0.16078	-0.278801	-0.0427587	0.00758393	0	0.392186	0.102383	-0.185855	-0.313434	-0.0582761	0.00430037	0.0290275
PC O-16:0;0/20:3;0	-0.265958	-0.476341	-0.0555751	0.0132228	0.662603	0.0149044	0.164777	-0.235682	-0.452355	-0.0190096	0.0330135	0.130444
PC O-18:0;0/14:0;0	-0.147203	-0.265999	-0.0284078	0.015155	0	0.185751	0.175365	-0.0736315	-0.201598	0.0543351	0.259423	0.460666
LPE 18:2;0	0.162605	0.0273652	0.297844	0.0184453	0.239105	0.104962	0.19921	0.162933	0.00142649	0.324439	0.0480105	0.176766
SM 36:2;2	-0.182812	-0.33866	-0.0269646	0.0215007	0.39218	0.069684	0.21245	-0.207246	-0.344692	-0.0698005	0.0031235	0.0229906
PC O-16:0;0/16:1;0	-0.19515	-0.362517	-0.0277831	0.0222941	0.472209	0.0515788	0.21245	-0.194098	-0.364242	-0.0239531	0.025359	0.114116
PC O-16:0;0/16:0;0	-0.135599	-0.254168	-0.0170313	0.024994	0	0.499544	0.224946	-0.157664	-0.285929	-0.0293988	0.0159877	0.0809378
LPC 18:2;0	0.130458	0.0123974	0.248519	0.0303281	0	0.365674	0.24643	0.202217	0.0746401	0.329794	0.00189215	0.0153264
PC O-16:1;0/20:4;0	-0.146606	-0.279357	-0.0138557	0.0304235	0.182079	0.117883	0.24643	-0.138889	-0.282946	0.00516701	0.0588029	0.19846
PC 18:0;0_22:5;0	-0.127667	-0.246153	-0.00918051	0.0347015	0	0.639783	0.267697	-0.0903664	-0.218252	0.0375195	0.16607	0.364428
SM 42:2;2	-0.14089	-0.273551	-0.0082283	0.0373854	0.190073	0.116085	0.2686	-0.161973	-0.299462	-0.0244837	0.0209442	0.0997931
PC 18:1;0_20:3;0	-0.125298	-0.24374	-0.00685534	0.0381346	0	0.23696	0.2686	-0.116705	-0.244735	0.0113246	0.0740023	0.239767
CE 14:0;0	-0.147429	-0.289996	-0.00486318	0.0426807	0.277405	0.0961781	0.288094	-0.183988	-0.347659	-0.0203174	0.027576	0.114546
PC 18:0;0_20:5;0	-0.168629	-0.339775	0.00251643	0.053465	0.488798	0.0479326	0.33874	-0.0929045	-0.22077	0.0349609	0.154426	0.364428
Cer 40:1;2	0.152516	-0.00310344	0.308135	0.0547472	0.388259	0.0705854	0.33874	-0.0263039	-0.15291	0.100302	0.683858	0.821268
CE 22:6;0	-0.141966	-0.287837	0.00390512	0.0564567	0.314556	0.0876064	0.33874	-0.104722	-0.260775	0.0513313	0.188421	0.378333
PC O-16:0;0/20:4;0	-0.182916	-0.378129	0.0122969	0.0662835	0.606495	0.0241681	0.383497	-0.226172	-0.354059	-0.0982844	0.000527791	0.00610729
PC O-17:0;0/17:1;0	-0.15176	-0.316382	0.0128613	0.0707874	0.451606	0.0561699	0.395433	-0.165146	-0.342015	0.0117241	0.0672433	0.222315
PC 18:0;0_20:4;0	-0.180319	-0.383145	0.0225067	0.0814253	0.635679	0.0191292	0.439697	-0.151445	-0.385138	0.0822493	0.204032	0.391046
PC O-16:0;0/18:2;0	-0.165328	-0.368993	0.0383361	0.111601	0.638639	0.0186438	0.569609	-0.0947813	-0.308747	0.119185	0.385278	0.569348
PC 18:0;0_18:1;0	-0.0948871	-0.213307	0.0235325	0.116304	0	0.509424	0.569609	-0.113293	-0.241358	0.0147717	0.0829375	0.263448
DAG 18:2;0_18:2;0	0.0938883	-0.02468	0.212457	0.120663	0	0.212918	0.569609	-0.0110662	-0.138961	0.116828	0.865334	0.920709
PC O-18:1;0/16:0;0	-0.0971006	-0.219862	0.0256604	0.121075	0.0550022	0.145728	0.569609	-0.0913014	-0.219591	0.0369879	0.163054	0.364428
PC 17:0;0_20:3;0	-0.141458	-0.321492	0.0385766	0.123561	0.542557	0.0365313	0.569609	-0.145396	-0.349251	0.0584583	0.162138	0.364428
PC O-18:2;0/16:0;0	-0.144758	-0.330473	0.0409559	0.12658	0.565202	0.0319751	0.569609	-0.0874848	-0.274419	0.0994499	0.359008	0.564654
PC 18:1;0_18:1;0	0.0881004	-0.0306628	0.206864	0.145965	0	0.180355	0.585124	0.026595	-0.101641	0.154831	0.68439	0.821268
PC 16:0;0_16:1;0	-0.0929364	-0.218401	0.0325278	0.14655	0.101241	0.135767	0.585124	-0.180376	-0.310135	-0.0506162	0.00643988	0.0372593
TAG 54:5;0	0.152804	-0.0534816	0.359089	0.146551	0.645177	0.0175891	0.585124	-0.0109065	-0.13849	0.116677	0.866939	0.920709
TAG 48:2;0	-0.13707	-0.323202	0.0490625	0.148925	0.567123	0.0315966	0.585124	-0.268338	-0.436867	-0.0998079	0.00180417	0.0153264
Cer 42:1;2	0.0866997	-0.0319775	0.205377	0.152186	0	0.294932	0.585124	-0.035591	-0.162875	0.0916934	0.583664	0.732973
TAG 54:6;0	0.102949	-0.0387519	0.244651	0.154458	0.266063	0.0987862	0.585124	-0.0247047	-0.152693	0.103283	0.705193	0.825566
PC O-18:1;0/20:3;0	-0.140675	-0.334704	0.0533532	0.155311	0.603355	0.0247358	0.585124	-0.0862205	-0.278425	0.105984	0.379285	0.569348
DAG 16:1;0_18:1;0	-0.17758	-0.424663	0.0695035	0.158943	0.755149	0.00426302	0.5852	-0.332666	-0.459664	-0.205669	2.83542e-07	4.59339e-05
LPC 18:0;0	-0.130857	-0.318608	0.0568929	0.171924	0.578949	0.029298	0.616461	-0.00890027	-0.206991	0.18919	0.929828	0.954137
PE 18:1;0_18:1;0	0.139501	-0.0621083	0.341111	0.175044	0.633887	0.0194255	0.616461	0.0242041	-0.118768	0.167176	0.740035	0.838361
PC 18:0;0_18:3;0	-0.163175	-0.410672	0.0843222	0.196286	0.756362	0.00416855	0.665555	-0.110023	-0.270061	0.0500149	0.177839	0.377105
LPC 20:3;0	-0.0766326	-0.195079	0.0418135	0.204775	0	0.362617	0.665555	-0.0137399	-0.177727	0.150247	0.869559	0.920709
SM 40:2;2	-0.0760856	-0.194318	0.0421469	0.207206	0	0.527786	0.665555	-0.0725668	-0.200021	0.054887	0.264456	0.460666
PC 14:0;0_18:1;0	-0.0753289	-0.193903	0.0432452	0.213079	0	0.234866	0.665555	-0.0915341	-0.219559	0.0364913	0.161121	0.364428
PC O-16:1;0/16:0;0	-0.0841692	-0.218861	0.0505226	0.220656	0.202524	0.113276	0.665555	-0.110979	-0.239134	0.0171757	0.089643	0.279273
PC O-16:0;0/18:1;0	-0.0741894	-0.1931	0.0447206	0.221388	0	0.342564	0.665555	-0.0802435	-0.208792	0.0483049	0.221154	0.407255
PC O-18:1;0/20:4;0	-0.150425	-0.391559	0.0907076	0.221451	0.741253	0.00543238	0.665555	-0.173426	-0.349928	0.00307576	0.0541282	0.190625
SM 40:1;2	0.0715956	-0.0465144	0.189706	0.2348	0	0.40936	0.665555	-0.0224471	-0.170732	0.125838	0.766699	0.856588
TAG 46:1;0	-0.0996968	-0.267445	0.068051	0.244077	0.469885	0.0520934	0.665555	-0.21438	-0.383068	-0.0456923	0.0127435	0.0665952
PE O-16:1;0/20:4;0	-0.124361	-0.333903	0.0851801	0.244739	0.657766	0.0156307	0.665555	-0.159003	-0.375504	0.0574975	0.150025	0.364428
CE 20:5;0	-0.120274	-0.323357	0.0828097	0.245737	0.635378	0.0191789	0.665555	-0.0614293	-0.266163	0.143304	0.556481	0.716393
TAG 54:4;0	0.156032	-0.108492	0.420555	0.247639	0.783912	0.00234793	0.665555	-0.0238449	-0.151111	0.103421	0.713452	0.825566
CE 17:1;0	-0.0690159	-0.187138	0.0491061	0.252143	0	0.549323	0.665555	-0.0901458	-0.217839	0.0375477	0.166467	0.364428
PC 18:2;0_18:2;0	0.109671	-0.0785689	0.29791	0.253496	0.577885	0.0295025	0.665555	0.0920328	-0.0936308	0.277696	0.331276	0.542088
TAG 49:2;0	-0.121023	-0.329267	0.0872202	0.254679	0.652485	0.0164404	0.665555	-0.258209	-0.391493	-0.124925	0.000146457	0.00263622
TAG 48:3;0	-0.0868303	-0.236251	0.0625901	0.254719	0.337127	0.0823872	0.665555	-0.184291	-0.350184	-0.0183977	0.0294562	0.119298
PC 16:0;0_20:5;0	-0.0694052	-0.190554	0.051744	0.261504	0.0300106	0.151024	0.672438	-0.0304277	-0.158704	0.0978489	0.641996	0.78198
CE 15:0;0	-0.0634105	-0.182217	0.0553962	0.29552	0	0.644965	0.746522	-0.0570288	-0.185288	0.0712302	0.383496	0.569348
PC O-16:1;0/18:2;0	-0.0973896	-0.282852	0.088073	0.303381	0.568186	0.0313878	0.746522	-0.00443079	-0.185005	0.176143	0.961643	0.969588
SM 34:1;2	-0.0618469	-0.179809	0.0561152	0.304139	0	0.858433	0.746522	-0.0853893	-0.212848	0.0420697	0.189166	0.378333
PC 16:1;0_18:1;0	-0.0599511	-0.178203	0.0583012	0.320391	0	0.345774	0.761835	-0.0874686	-0.215111	0.0401734	0.179241	0.377105
TAG 56:6;0	0.138279	-0.139496	0.416053	0.329218	0.804632	0.00137643	0.761835	-0.0561088	-0.183431	0.0712137	0.387741	0.569348
PI 16:0;0_18:1;0	0.0908234	-0.0922038	0.273851	0.330757	0.558475	0.0333104	0.761835	0.00854992	-0.11882	0.13592	0.895328	0.940881
PC 14:0;0_18:2;0	0.0588424	-0.0600141	0.177699	0.331886	0	0.189633	0.761835	-0.00977456	-0.162577	0.143028	0.900225	0.940881
LPE 20:4;0	0.0879494	-0.0919821	0.267881	0.338054	0.541971	0.0366515	0.761835	0.0946817	-0.111542	0.300906	0.368195	0.569348
TAG 48:1;0	-0.112837	-0.345976	0.120302	0.342824	0.723317	0.00717552	0.761835	-0.28519	-0.436646	-0.133734	0.000223743	0.00298401
PC 16:0;0_20:1;0	0.0683898	-0.0734484	0.210228	0.344643	0.271404	0.0975587	0.761835	0.000899758	-0.127165	0.128965	0.989013	0.989013
PC 18:1;0_18:2;0	0.0894501	-0.0976063	0.276506	0.348629	0.575369	0.0299881	0.761835	0.0223726	-0.157301	0.202046	0.807191	0.878873
PC 16:0;0_18:0;0	-0.100494	-0.313801	0.112812	0.355803	0.671712	0.0135779	0.761835	-0.166187	-0.378419	0.0460451	0.124848	0.348714
TAG 46:2;0	-0.0553011	-0.174614	0.0640121	0.363649	0.0072716	0.155787	0.761835	-0.151069	-0.295391	-0.006748	0.040208	0.155088
DAG 18:1;0_18:3;0	0.0543814	-0.0643	0.173063	0.369142	0	0.209904	0.761835	-0.0781114	-0.205667	0.0494442	0.230052	0.418746
PC 17:0;0_18:2;0	0.0895193	-0.110313	0.289351	0.379938	0.626477	0.0206698	0.761835	-0.0081303	-0.191044	0.174783	0.930578	0.954137
TAG 50:4;0	-0.0526486	-0.171793	0.0664958	0.386443	0	0.299367	0.761835	-0.163095	-0.291261	-0.0349304	0.0126264	0.0665952
TAG 56:5;0	0.140662	-0.178292	0.459616	0.387389	0.852476	0.000231416	0.761835	-0.0606991	-0.18766	0.0662622	0.348737	0.557048
DAG 16:0;0_18:2;0	0.130733	-0.167044	0.428509	0.389523	0.830759	0.000586782	0.761835	-0.0907286	-0.217373	0.0359158	0.160281	0.364428
PE O-18:2;0/20:4;0	-0.0761909	-0.249755	0.0973731	0.389578	0.504763	0.0444742	0.761835	-0.0857865	-0.286102	0.114529	0.401262	0.580397
PC O-18:1;0/18:2;0	-0.125105	-0.410543	0.160334	0.390323	0.816526	0.000961255	0.761835	-0.0459165	-0.290433	0.1986	0.712835	0.825566
PE O-18:2;0/18:2;0	-0.0840181	-0.283227	0.115191	0.408445	0.623404	0.0211944	0.787716	-0.0679709	-0.298845	0.162903	0.563921	0.719332
LPC 16:0;0	-0.0490828	-0.167664	0.0694981	0.417213	0	0.22119	0.79516	-0.0256439	-0.175918	0.12463	0.73803	0.838361
CE 18:3;0	-0.0612821	-0.212663	0.0900993	0.427527	0.353769	0.0785396	0.795963	-0.0648308	-0.200997	0.0713357	0.350734	0.557048
Cer 40:2;2	0.0971379	-0.143807	0.338083	0.42943	0.741492	0.00541095	0.795963	-0.0326169	-0.160166	0.0949317	0.616227	0.762052
TAG 50:3;0	-0.0823534	-0.287936	0.123229	0.432375	0.642488	0.0180199	0.795963	-0.239229	-0.366611	-0.111848	0.000232401	0.00298401
PC 16:0;0_20:3;0	-0.103014	-0.367719	0.16169	0.445611	0.787817	0.00213952	0.811112	-0.201452	-0.442431	0.039527	0.101322	0.303967
TAG 52:4;0	0.0762693	-0.126583	0.279121	0.461173	0.632468	0.0196616	0.830111	-0.0908355	-0.218285	0.0366134	0.162441	0.364428
TAG 54:3;0	0.12383	-0.214209	0.46187	0.472774	0.868376	9.69728e-05	0.835493	-0.0919392	-0.218484	0.034606	0.154453	0.364428
PI 18:1;0_18:2;0	0.0533008	-0.0927644	0.199366	0.474478	0.313428	0.0878671	0.835493	0.0325157	-0.129222	0.194253	0.693558	0.825566
DAG 18:1;0_18:2;0	0.0950708	-0.172189	0.36233	0.485673	0.788484	0.00210512	0.841897	-0.0901337	-0.21732	0.0370521	0.164838	0.364428
TAG 56:4;0	0.101226	-0.185196	0.387649	0.488508	0.816046	0.000976138	0.841897	-0.0469904	-0.174573	0.0805924	0.470368	0.64576
LPC 18:1;0	0.056201	-0.109218	0.22162	0.505477	0.459622	0.0543761	0.861972	0.171929	-0.0570338	0.400893	0.14109	0.364428
PC 18:0;0_18:2;0	-0.0790658	-0.320969	0.162837	0.521774	0.744742	0.00512379	0.876641	-0.17681	-0.433645	0.0800251	0.177249	0.377105
TAG 56:7;0	0.0670792	-0.139702	0.27386	0.524902	0.647139	0.0172776	0.876641	-0.0849314	-0.212662	0.0427994	0.192497	0.380298
PI 18:0;0_20:3;0	-0.0642553	-0.280188	0.151677	0.559739	0.680287	0.0123801	0.904864	-0.122437	-0.27806	0.0331855	0.12307	0.348714
TAG 53:4;0	0.0545985	-0.130023	0.23922	0.562168	0.55655	0.0336954	0.904864	-0.0865915	-0.214497	0.0413135	0.184544	0.378333
TAG 49:1;0	-0.0783315	-0.350024	0.193361	0.572022	0.795887	0.00174655	0.904864	-0.254665	-0.381553	-0.127776	8.36652e-05	0.00169422
TAG 50:2;0	-0.083147	-0.374852	0.208558	0.576392	0.823477	0.000762666	0.904864	-0.282387	-0.419045	-0.145728	5.12185e-05	0.00169422
PE O-18:1;0/18:2;0	0.0479487	-0.121256	0.217153	0.578615	0.482571	0.0492955	0.904864	0.0285991	-0.14638	0.203578	0.748708	0.842297
PC 16:0;0_20:2;0	-0.0783863	-0.356333	0.19956	0.580436	0.806885	0.00129017	0.904864	-0.138952	-0.39727	0.119365	0.291751	0.49233
CE 17:0;0	0.0322887	-0.086359	0.150936	0.593768	0	0.523161	0.904864	0.0230894	-0.10488	0.151059	0.723613	0.831385
PC 17:0;0_18:1;0	0.0323228	-0.0867177	0.151363	0.594598	0	0.231748	0.904864	-0.0159098	-0.144466	0.112646	0.808346	0.878873
PE 16:0;0_20:4;0	0.0904335	-0.244835	0.425702	0.597035	0.867404	0.000102863	0.904864	-0.0744711	-0.244307	0.0953651	0.390109	0.569348
TAG 58:8;0	0.0383978	-0.108221	0.185017	0.607748	0.317328	0.0869656	0.904864	-0.0408206	-0.168787	0.0871454	0.531827	0.695641
TAG 56:3;0	0.0759194	-0.222352	0.374191	0.61787	0.830396	0.000594794	0.904864	-0.0894958	-0.2279	0.0489089	0.205027	0.391046
PE O-18:2;0/18:1;0	0.0291095	-0.0894918	0.147711	0.630478	0	0.258495	0.904864	0.016005	-0.112117	0.144127	0.806581	0.878873
PC 16:0;0_22:6;0	-0.0487207	-0.247678	0.150237	0.631259	0.623008	0.0212624	0.904864	-0.0861977	-0.21338	0.0409846	0.184058	0.378333
TAG 52:5;0	0.0288552	-0.0903574	0.148068	0.635211	0	0.315566	0.904864	-0.0807015	-0.208901	0.047498	0.217279	0.407255
PI 18:0;0_18:1;0	-0.0490619	-0.253641	0.155517	0.638329	0.642555	0.0180091	0.904864	-0.131445	-0.315454	0.0525647	0.161491	0.364428
PC 18:2;0_20:4;0	-0.0279163	-0.14708	0.0912473	0.646121	0	0.444928	0.904864	-0.0317593	-0.160267	0.0967483	0.628113	0.770866
PC 16:0;0_18:2;0	0.0809912	-0.273308	0.43529	0.654125	0.881482	3.99232e-05	0.904864	-0.101307	-0.397276	0.194662	0.502302	0.672503
TAG 52:3;0	0.0744841	-0.253258	0.402226	0.656009	0.85971	0.000159532	0.904864	-0.143236	-0.269776	-0.0166962	0.026516	0.114546
TAG 56:8;0	0.0301775	-0.103564	0.163919	0.658309	0.186809	0.11682	0.904864	-0.0562449	-0.184469	0.0719795	0.38994	0.569348
Cer 42:2;2	0.0609664	-0.209227	0.33116	0.658311	0.793907	0.00183832	0.904864	-0.108092	-0.235154	0.0189701	0.0954457	0.29174
PE 16:0;0_18:2;0	0.0752863	-0.259193	0.409766	0.659098	0.86737	0.000103072	0.904864	-0.10599	-0.378098	0.166117	0.445202	0.638255
TAG 53:3;0	0.0660599	-0.243333	0.375453	0.675596	0.842026	0.000373502	0.919719	-0.123079	-0.25029	0.00413183	0.0579199	0.19846
PC O-18:2;0/18:1;0	-0.024732	-0.143359	0.0938945	0.682814	0	0.164174	0.92171	0.0490623	-0.0790551	0.17718	0.452915	0.643617
PC O-18:0;0/20:4;0	-0.027947	-0.170443	0.114549	0.700683	0.277941	0.0960547	0.92171	-0.0828361	-0.210985	0.0453124	0.205179	0.391046
TAG 51:4;0	0.0244456	-0.105124	0.154015	0.711544	0.135317	0.128297	0.92171	-0.0927957	-0.22097	0.0353791	0.155908	0.364428
CE 18:1;0	0.0217544	-0.0968518	0.140361	0.719228	0	0.179109	0.92171	-0.0610874	-0.189162	0.0669872	0.349871	0.557048
PI 18:0;0_18:2;0	0.0390113	-0.18055	0.258572	0.727657	0.68952	0.0111475	0.92171	-0.065499	-0.284192	0.153194	0.557194	0.716393
SM 36:1;2	-0.0371147	-0.250514	0.176285	0.733194	0.671096	0.0136658	0.92171	-0.176115	-0.326898	-0.0253325	0.0220648	0.102128
SM 32:1;2	-0.0205768	-0.139066	0.0979125	0.73358	0	0.471287	0.92171	-0.096513	-0.288115	0.0950885	0.323511	0.534784
TAG 52:6;0	-0.0203841	-0.139618	0.0988501	0.73757	0	0.962028	0.92171	-0.0802912	-0.208935	0.0483532	0.221225	0.407255
PC 16:0;0_22:5;0	0.0199458	-0.0990498	0.138941	0.742515	0	0.181989	0.92171	0.0112963	-0.116909	0.139501	0.862891	0.920709
PE 18:0;0_20:4;0	0.0523459	-0.260485	0.365176	0.742941	0.847282	0.000295926	0.92171	-0.110097	-0.254663	0.0344682	0.135527	0.364428
LPC 20:4;0	0.0528906	-0.26381	0.369591	0.743423	0.850345	0.000256487	0.92171	0.146695	-0.257832	0.551222	0.477241	0.649689
TAG 58:7;0	0.0346738	-0.180175	0.249523	0.751765	0.672091	0.0135239	0.92171	-0.101094	-0.229055	0.0268675	0.121517	0.348714
DAG 18:1;0_18:1;0	0.0537723	-0.293777	0.401321	0.761705	0.875613	6.076e-05	0.92171	-0.171024	-0.297538	-0.0445112	0.00806019	0.0450259
CE 20:4;0	-0.0421196	-0.319723	0.235483	0.766178	0.805357	0.0013483	0.92171	-0.0783618	-0.356402	0.199678	0.580681	0.732973
PC 16:0;0_16:0;0	-0.0447245	-0.344531	0.255082	0.769994	0.831915	0.000561712	0.92171	-0.183495	-0.311146	-0.0558446	0.00484126	0.0307311
TAG 54:7;0	0.0173279	-0.101909	0.136565	0.775776	0	0.247716	0.92171	-0.046201	-0.174788	0.0823863	0.481303	0.649759
PC 16:0;0_17:1;0	0.0258722	-0.153098	0.204842	0.77692	0.534369	0.038219	0.92171	-0.0679383	-0.196093	0.0602163	0.29879	0.49901
CE 16:0;0	-0.0285991	-0.228783	0.171585	0.779471	0.625344	0.0208626	0.92171	-0.152757	-0.280375	-0.0251386	0.018974	0.0931449
TAG 51:2;0	-0.041784	-0.355277	0.271709	0.793912	0.846894	0.000301215	0.922974	-0.240821	-0.367468	-0.114174	0.00019386	0.00298401
TAG 48:0;0	-0.0395087	-0.342456	0.263438	0.798254	0.836817	0.000463713	0.922974	-0.234493	-0.385672	-0.0833137	0.00236512	0.0182452
PC 16:0;0_18:1;0	0.0351058	-0.235468	0.30568	0.799266	0.796017	0.00174064	0.922974	-0.0844685	-0.240285	0.0713479	0.288008	0.491129
PE 18:0;0_18:2;0	0.038801	-0.269051	0.346653	0.804886	0.842431	0.000367049	0.922974	-0.16914	-0.464538	0.126259	0.26176	0.460666
PI 18:0;0_20:4;0	0.0472862	-0.342591	0.437163	0.812103	0.901434	6.65127e-06	0.922974	-0.125727	-0.298744	0.0472896	0.154371	0.364428
TAG 52:2;0	0.046014	-0.349987	0.442015	0.819847	0.904628	4.66397e-06	0.922974	-0.205654	-0.331309	-0.0799994	0.00133757	0.0135429
PC 16:0;0_22:4;0	-0.0156319	-0.153622	0.122358	0.82429	0.232921	0.106373	0.922974	-0.0482615	-0.176609	0.0800862	0.461129	0.644291
Chol	-0.0146161	-0.151244	0.122011	0.833923	0.218421	0.109673	0.922974	-0.147896	-0.298049	0.00225703	0.0535446	0.190625
PC 16:0;0_20:4;0	0.03072	-0.260964	0.322404	0.836461	0.82278	0.000781181	0.922974	-0.0662117	-0.267643	0.135219	0.519411	0.689709
CE 18:2;0	0.0157725	-0.134971	0.166516	0.837514	0.358574	0.0774293	0.922974	-0.0718792	-0.199427	0.0556689	0.269364	0.464222
PI 18:1;0_18:1;0	0.0162224	-0.150379	0.182824	0.848645	0.463481	0.053516	0.925769	0.00420086	-0.176229	0.184631	0.963603	0.969588
PC O-18:2;0/18:2;0	-0.0242612	-0.293204	0.244682	0.85966	0.792619	0.00189961	0.925769	0.0395583	-0.233869	0.312985	0.776748	0.861871
PE O-18:1;0/20:4;0	-0.0156214	-0.191485	0.160242	0.861788	0.517454	0.0417654	0.925769	-0.0680943	-0.223162	0.0869729	0.389417	0.569348
PC 16:1;0_18:2;0	-0.017334	-0.216029	0.181361	0.864235	0.624998	0.0209218	0.925769	-0.0671539	-0.277999	0.143691	0.532466	0.695641
TAG 53:2;0	0.0302981	-0.328711	0.389307	0.868622	0.883376	3.45565e-05	0.925769	-0.176911	-0.303492	-0.0503301	0.00615762	0.0369457
TAG 51:1;0	-0.0262496	-0.362941	0.310442	0.878552	0.867357	0.000103154	0.930231	-0.237007	-0.363468	-0.110546	0.000239457	0.00298401
DAG 16:0;0_18:1;0	0.0256361	-0.332897	0.384169	0.888547	0.882808	3.61026e-05	0.934705	-0.214039	-0.340493	-0.0875847	0.000908346	0.00981014
TAG 50:5;0	-0.00764924	-0.126701	0.111402	0.899787	0	0.669958	0.940422	-0.0745105	-0.202961	0.05394	0.255572	0.460029
TAG 51:3;0	-0.0136548	-0.252444	0.225135	0.910762	0.734344	0.00607295	0.945161	-0.182872	-0.310359	-0.0553845	0.00493215	0.0307311
CE 18:0;0	0.00842442	-0.148102	0.164951	0.915989	0.393024	0.0694901	0.945161	-0.0558753	-0.204543	0.0927922	0.461344	0.644291
PC 17:0;0_20:4;0	-0.00840933	-0.285664	0.268846	0.952596	0.803324	0.00142822	0.976712	0.0152054	-0.283881	0.314291	0.920627	0.954137
TAG 50:1;0	-0.00788634	-0.363849	0.348076	0.965364	0.882099	3.81068e-05	0.983579	-0.259899	-0.422443	-0.0973562	0.00172503	0.0153264
PI 16:0;0_18:2;0	0.00411072	-0.250808	0.25903	0.974787	0.782054	0.00245132	0.986649	-0.103315	-0.383227	0.176597	0.469423	0.64576
PC 18:1;0_20:4;0	-0.00349327	-0.284458	0.277472	0.980559	0.808879	0.00121684	0.986649	0.00685533	-0.281031	0.294742	0.962775	0.969588
PC 16:0;0_18:3;0	0.000715785	-0.176716	0.178147	0.993691	0.524901	0.0401946	0.993691	-0.0370837	-0.2252	0.151032	0.699222	0.825566

## Sheet: SIRD
SIRD
Unadjusted model								Adjusted model
Variable	Effect	Lower	Upper	P-value	I2	Heterogeneity	P-value (FDR)	Effect	Lower	Upper	P-value	P-value (FDR)
PC O-16:0;0/18:1;0	-0.321046	-0.421673	-0.220418	4.02245e-10	0	0.378889	6.51637e-08	-0.0510435	-0.285498	0.183411	0.669593	0.786044
PC O-18:1;0/18:2;0	-0.309936	-0.410342	-0.209529	1.44815e-09	0	0.234202	1.08974e-07	-0.0955344	-0.213188	0.0221196	0.111501	0.220283
PC O-18:1;0/16:0;0	-0.305931	-0.406549	-0.205313	2.53342e-09	0	0.683839	1.08974e-07	-0.0983356	-0.234577	0.0379061	0.157171	0.289338
PC 18:2;0_18:2;0	-0.358344	-0.476396	-0.240292	2.69071e-09	0.251166	0.102203	1.08974e-07	-0.233136	-0.374477	-0.0917959	0.00122542	0.0082716
LPC 18:2;0	-0.350702	-0.468041	-0.233363	4.68673e-09	0.244458	0.103739	1.50742e-07	-0.0283305	-0.214948	0.158287	0.766052	0.846473
PE O-18:2;0/18:1;0	-0.299428	-0.400112	-0.198744	5.58305e-09	0	0.474916	1.50742e-07	-0.242179	-0.361374	-0.122984	6.82733e-05	0.00092169
CE 18:2;0	-0.288191	-0.388101	-0.188281	1.57192e-08	0	0.435239	3.63787e-07	-0.184659	-0.302389	-0.0669287	0.00211077	0.0123049
SM 42:2;2	-0.325693	-0.441492	-0.209894	3.53666e-08	0.228138	0.107463	7.16174e-07	-0.168737	-0.285866	-0.0516076	0.00474978	0.0212232
SM 34:1;2	-0.326393	-0.44329	-0.209496	4.43726e-08	0.237811	0.105257	7.98706e-07	-0.123724	-0.24062	-0.00682831	0.0380373	0.0971635
SM 40:1;2	-0.369001	-0.502701	-0.235301	6.32522e-08	0.411294	0.065304	1.02469e-06	-0.400874	-0.518376	-0.283371	2.28331e-11	3.69896e-09
PC 16:1;0_18:2;0	-0.262548	-0.362468	-0.162627	2.60564e-07	0	0.190792	3.8374e-06	-0.315814	-0.433894	-0.197734	1.58782e-07	1.28613e-05
CE 18:3;0	-0.264068	-0.364963	-0.163173	2.90129e-07	0	0.207624	3.91674e-06	-0.280236	-0.399638	-0.160833	4.22468e-06	9.77711e-05
PC O-16:1;0/18:2;0	-0.453426	-0.628576	-0.278276	3.89676e-07	0.654272	0.0161645	4.85596e-06	-0.07493	-0.189725	0.0398651	0.200783	0.336203
PC 18:2;0_20:4;0	-0.389529	-0.54222	-0.236838	5.73173e-07	0.537171	0.0376394	6.63243e-06	-0.257148	-0.421214	-0.0930816	0.00212678	0.0123049
PC O-16:1;0/16:0;0	-0.256681	-0.357678	-0.155683	6.32054e-07	0	0.24138	6.82619e-06	0.00430758	-0.114071	0.122686	0.943143	0.966952
PE O-18:2;0/18:2;0	-0.242327	-0.342984	-0.14167	2.37565e-06	0	0.479755	2.40534e-05	-0.173966	-0.292941	-0.0549908	0.00415868	0.0198149
PC O-16:1;0/20:4;0	-0.317553	-0.455202	-0.179903	6.13803e-06	0.435445	0.0598112	5.84919e-05	-0.0977509	-0.215526	0.0200238	0.103793	0.212842
TAG 51:3;0	0.42779	0.235283	0.620297	1.32804e-05	0.707859	0.00888396	0.000115733	0.0408206	-0.0757272	0.157369	0.492415	0.644909
PC O-16:0;0/18:2;0	-0.411683	-0.597145	-0.22622	1.35737e-05	0.687413	0.0114236	0.000115733	-0.142393	-0.259774	-0.0250123	0.0174255	0.0576107
SM 40:2;2	-0.304864	-0.443355	-0.166372	1.59974e-05	0.444405	0.0577884	0.000129579	-0.163426	-0.304216	-0.0226356	0.0229012	0.0687037
PC 18:1;0_18:2;0	-0.261429	-0.380792	-0.142066	1.76493e-05	0.26387	0.09929	0.000136152	-0.210058	-0.362202	-0.0579147	0.00680908	0.0269042
PC O-18:2;0/18:2;0	-0.342925	-0.500315	-0.185536	1.95098e-05	0.565097	0.0319956	0.000143663	-0.100865	-0.218583	0.0168541	0.0930838	0.198415
PC O-16:1;0/18:1;0	-0.373354	-0.54567	-0.201038	2.17026e-05	0.653017	0.0163581	0.000152862	0.0244087	-0.090594	0.139411	0.677416	0.788344
TAG 49:1;0	0.437227	0.23222	0.642235	2.91397e-05	0.743673	0.00521728	0.000191189	-0.0449263	-0.159568	0.0697151	0.442439	0.592357
DAG 18:1;0_18:2;0	0.319422	0.169151	0.469693	3.09751e-05	0.518672	0.0415076	0.000191189	-0.0150187	-0.131946	0.101908	0.801236	0.859335
PC O-18:2;0/16:0;0	-0.400011	-0.588345	-0.211676	3.14322e-05	0.695773	0.0103477	0.000191189	-0.115123	-0.232815	0.00256863	0.0552141	0.131539
TAG 51:1;0	0.450215	0.238084	0.662346	3.18649e-05	0.760555	0.00385128	0.000191189	-0.0552067	-0.168908	0.0584946	0.341278	0.489266
DAG 16:0;0_18:1;0	0.351231	0.18457	0.517892	3.61901e-05	0.607494	0.0239885	0.000209385	-0.124445	-0.238362	-0.010528	0.0322659	0.091703
TAG 53:4;0	0.348535	0.181365	0.515706	4.38197e-05	0.609707	0.0235923	0.000244786	0.0604419	-0.0575026	0.178386	0.315184	0.455891
TAG 49:2;0	0.440699	0.227952	0.653446	4.90718e-05	0.762069	0.00374026	0.000264988	0.00377529	-0.112013	0.119563	0.949046	0.966952
PE O-18:1;0/18:2;0	-0.245415	-0.364815	-0.126015	5.61285e-05	0.260718	0.100014	0.000288154	-0.129164	-0.248027	-0.0102998	0.0331882	0.0926979
TAG 58:8;0	0.315735	0.161998	0.469473	5.69193e-05	0.543677	0.0363021	0.000288154	0.155286	-0.0635873	0.37416	0.164361	0.295849
TAG 51:2;0	0.444215	0.225686	0.662744	6.77317e-05	0.774366	0.00290863	0.000332501	-0.0240663	-0.138914	0.0907814	0.681285	0.788344
PC 16:0;0_18:2;0	-0.202785	-0.303604	-0.101966	8.07318e-05	0	0.392053	0.000384663	-0.293122	-0.412083	-0.174161	1.36958e-06	4.593e-05
PC O-18:1;0/20:3;0	-0.198538	-0.299453	-0.0976229	0.000115262	0	0.593479	0.000533497	-0.167159	-0.286417	-0.0479005	0.00601083	0.0249681
TAG 53:3;0	0.386315	0.188097	0.584532	0.000133532	0.722374	0.00727434	0.000600894	0.0176868	-0.0991578	0.134531	0.76671	0.846473
TAG 51:4;0	0.358331	0.171243	0.545419	0.000174081	0.688322	0.0113041	0.000750649	0.0516568	-0.0663106	0.169624	0.390755	0.541045
TAG 52:3;0	0.361249	0.172494	0.550004	0.000176078	0.693733	0.0106055	0.000750649	-0.0646117	-0.179953	0.0507298	0.272236	0.428177
PC O-18:1;0/20:4;0	-0.235348	-0.358627	-0.112068	0.000182793	0.298128	0.0914012	0.000759292	-0.145631	-0.264637	-0.0266261	0.0164631	0.0555628
TAG 53:2;0	0.411553	0.191147	0.631959	0.000252462	0.776794	0.00275903	0.00102247	-0.0321157	-0.147432	0.0832011	0.585169	0.718162
TAG 52:4;0	0.322882	0.147526	0.498238	0.000307537	0.644513	0.0176951	0.00121515	-0.0353888	-0.15221	0.0814326	0.55269	0.699
TAG 56:7;0	0.374847	0.170877	0.578817	0.000315859	0.738994	0.00563753	0.00121831	0.134626	-0.0542812	0.323533	0.162479	0.295749
TAG 56:8;0	0.339447	0.153914	0.52498	0.000335918	0.684071	0.0118677	0.00126555	0.160971	-0.0182624	0.340204	0.0783637	0.173903
CE 16:0;0	-0.184528	-0.285656	-0.083399	0.000348474	0	0.17858	0.00128302	-0.165579	-0.285104	-0.0460548	0.00662418	0.0268279
TAG 58:7;0	0.403057	0.180251	0.625862	0.00039173	0.781413	0.00248761	0.00141023	0.108773	-0.0710146	0.288561	0.235703	0.38184
DAG 16:0;0_18:2;0	0.332097	0.138797	0.525396	0.000759077	0.708646	0.00879245	0.00267327	-0.0844694	-0.199873	0.0309345	0.151405	0.284967
SM 36:1;2	-0.171422	-0.272508	-0.0703361	0.000888259	0	0.218359	0.00306166	-0.211877	-0.331473	-0.0922806	0.000516067	0.00461503
PC 18:0;0_22:6;0	0.260694	0.104696	0.416691	0.00105522	0.555394	0.0339272	0.00356137	0.0868251	-0.0322707	0.205921	0.153038	0.284967
PC O-18:0;0/20:4;0	-0.208707	-0.334405	-0.083009	0.00113675	0.323189	0.0856105	0.00375824	-0.110351	-0.22957	0.00886695	0.0696485	0.156709
PC O-16:0;0/20:4;0	-0.196478	-0.315627	-0.0773281	0.00122935	0.251241	0.102186	0.0039436	-0.140006	-0.259493	-0.0205192	0.0216449	0.0674321
LPC 18:1;0	-0.293718	-0.471991	-0.115444	0.0012415	0.660673	0.0151923	0.0039436	0.0294809	-0.212921	0.271883	0.811594	0.859335
PC 14:0;0_18:2;0	-0.213732	-0.344468	-0.0829949	0.0013544	0.37103	0.0745537	0.00421946	-0.292937	-0.411993	-0.173882	1.41759e-06	4.593e-05
TAG 50:3;0	0.400299	0.152647	0.64795	0.00153466	0.823382	0.000765158	0.00469083	-0.0998968	-0.214539	0.0147453	0.0876599	0.189345
TAG 48:0;0	0.393112	0.1488	0.637424	0.00161217	0.819569	0.00087049	0.00475427	-0.183464	-0.295393	-0.0715358	0.00131532	0.00852329
TAG 48:1;0	0.411983	0.155012	0.668955	0.00167646	0.837051	0.000459362	0.00475427	-0.148274	-0.261092	-0.0354565	0.00999666	0.0368059
TAG 50:1;0	0.409623	0.154117	0.66513	0.00167697	0.835152	0.000495544	0.00475427	-0.198854	-0.309635	-0.0880722	0.000434568	0.0044877
TAG 52:2;0	0.390281	0.146515	0.634047	0.00170107	0.81759	0.000928828	0.00475427	-0.127567	-0.24096	-0.0141754	0.0274553	0.0794242
SM 38:2;2	-0.161604	-0.262546	-0.0606616	0.00170215	0	0.303972	0.00475427	-0.0622448	-0.181366	0.0568762	0.305766	0.446252
DAG 18:1;0_18:1;0	0.344251	0.126566	0.561937	0.00193838	0.769804	0.00320269	0.00532233	-0.101735	-0.216909	0.0134381	0.0834018	0.182582
TAG 50:2;0	0.414214	0.149525	0.678903	0.00216102	0.846363	0.000308566	0.00583475	-0.147532	-0.260144	-0.0349197	0.0102368	0.0368525
TAG 48:2;0	0.418418	0.14913	0.687705	0.00232382	0.851692	0.000240417	0.0060845	-0.107639	-0.221834	0.00655685	0.0646852	0.1497
SM 36:2;2	-0.170428	-0.280136	-0.0607208	0.00232864	0.130952	0.12926	0.0060845	-0.192687	-0.31239	-0.0729846	0.00160506	0.0100008
TAG 48:3;0	0.421194	0.148865	0.693523	0.00243462	0.854781	0.000206352	0.00626046	-0.0621313	-0.17778	0.0535174	0.292353	0.442628
TAG 46:1;0	0.421439	0.145754	0.697123	0.0027337	0.858716	0.000168273	0.00691969	-0.0965245	-0.211033	0.0179835	0.0985036	0.204937
CE 17:0;0	-0.153914	-0.255021	-0.0528063	0.00284866	0	0.360219	0.00709975	-0.00156316	-0.119516	0.11639	0.979278	0.98536
TAG 46:2;0	0.418977	0.141334	0.696621	0.00309964	0.860494	0.000152886	0.0076082	-0.069	-0.184479	0.0464788	0.241558	0.38365
TAG 50:4;0	0.37374	0.124274	0.623207	0.00332115	0.825137	0.000719759	0.00792812	-0.0697385	-0.186031	0.046554	0.239853	0.38365
TAG 52:5;0	0.306931	0.102015	0.511846	0.00332785	0.738793	0.00565603	0.00792812	-0.0410669	-0.158493	0.0763595	0.493061	0.644909
TAG 54:7;0	0.348519	0.113665	0.583373	0.00363112	0.801913	0.00148545	0.00852524	0.0685106	-0.0879051	0.224926	0.390632	0.541045
PC O-18:2;0/18:1;0	-0.218149	-0.366919	-0.0693784	0.00405327	0.509179	0.0435273	0.00938043	0.0177964	-0.100495	0.136088	0.768096	0.846473
TAG 56:4;0	0.368808	0.11396	0.623655	0.00456253	0.832417	0.000551068	0.0104103	-0.0465837	-0.186635	0.0934672	0.514451	0.661437
TAG 56:3;0	0.390899	0.120011	0.661787	0.00467984	0.852125	0.000235415	0.0104972	-0.0265168	-0.209889	0.156855	0.776852	0.850338
PC 16:0;0_22:5;0	-0.146236	-0.247846	-0.0446265	0.00479087	0	0.469451	0.0104972	-0.0659678	-0.185709	0.0537737	0.28024	0.434657
TAG 54:6;0	0.34202	0.10435	0.57969	0.004795	0.806857	0.00129124	0.0104972	-0.00086377	-0.153979	0.152252	0.991178	0.991178
TAG 54:4;0	0.302435	0.0895021	0.515368	0.00537269	0.757646	0.00406987	0.011605	-0.0761874	-0.193045	0.0406698	0.201306	0.336203
TAG 54:5;0	0.309928	0.0878182	0.532037	0.00623994	0.777977	0.00268791	0.0133009	-0.0594436	-0.183082	0.0641945	0.346026	0.491721
CE 18:1;0	-0.196594	-0.338984	-0.0542044	0.00680836	0.465069	0.0531626	0.0142448	-0.186546	-0.343301	-0.0297909	0.019677	0.0637534
TAG 52:6;0	0.319812	0.0877244	0.551899	0.00691746	0.796725	0.0017086	0.0142448	-0.00430793	-0.122291	0.113675	0.942949	0.966952
TAG 56:5;0	0.314884	0.0859374	0.543831	0.00702503	0.791668	0.00194573	0.0142448	-0.0324263	-0.200675	0.135822	0.705623	0.810716
PI 18:1;0_18:1;0	-0.139009	-0.240097	-0.0379211	0.00703449	0	0.387073	0.0142448	-0.177851	-0.297384	-0.0583181	0.00354329	0.0179379
TAG 56:6;0	0.28806	0.0738701	0.50225	0.00839096	0.761048	0.00381487	0.0167819	0.00386689	-0.18032	0.188054	0.967178	0.979267
TAG 54:3;0	0.343073	0.0868639	0.599281	0.0086786	0.833721	0.000524073	0.0171455	-0.131122	-0.254725	-0.00751827	0.0376008	0.0971635
PC O-16:0;0/20:3;0	-0.133141	-0.234389	-0.0318921	0.00995674	0	0.498818	0.0194336	-0.160499	-0.280008	-0.0409904	0.00848306	0.0327204
PC 16:0;0_22:6;0	0.12767	0.0265864	0.228753	0.0133064	0	0.673951	0.0255128	0.171616	0.0391641	0.304068	0.0111012	0.0390956
TAG 50:5;0	0.353848	0.073444	0.634252	0.0133864	0.861854	0.00014185	0.0255128	-0.0397506	-0.157104	0.0776029	0.506761	0.656762
PC O-18:0;0/14:0;0	-0.210574	-0.379596	-0.0415515	0.0146146	0.616308	0.0224249	0.0275299	-0.0998591	-0.218383	0.0186644	0.0986733	0.204937
PC 17:0;0_18:2;0	-0.155586	-0.284128	-0.0270443	0.0176765	0.352513	0.0788297	0.0329148	-0.210176	-0.329252	-0.0911001	0.000541269	0.00461503
DAG 16:1;0_18:1;0	0.319028	0.0422577	0.595799	0.0238701	0.858939	0.000166281	0.0439427	-0.119423	-0.235421	-0.00342611	0.0436065	0.107034
PE O-18:2;0/20:4;0	-0.113995	-0.215197	-0.0127935	0.0272628	0	0.247957	0.0496245	-0.0825864	-0.213036	0.0478634	0.214668	0.354859
DAG 18:2;0_18:2;0	0.190269	0.0193538	0.361184	0.0291167	0.626523	0.0206619	0.0524101	0.0212927	-0.0976094	0.140195	0.725599	0.823228
CE 20:2;0	-0.186926	-0.355671	-0.0181813	0.0299207	0.617503	0.0222159	0.0532654	-0.0180205	-0.224982	0.188941	0.864493	0.909401
PC O-16:0;0/16:0;0	-0.199432	-0.382982	-0.0158827	0.0332078	0.675289	0.0130722	0.0584123	-0.129807	-0.320108	0.0604945	0.18125	0.319158
LPC 20:4;0	-0.213184	-0.409752	-0.0166162	0.033533	0.716697	0.0078842	0.0584123	0.0361569	-0.235255	0.307569	0.794014	0.859335
PC 18:1;0_20:4;0	-0.174371	-0.345468	-0.0032745	0.0457737	0.624424	0.0210197	0.0788866	-0.0485788	-0.320965	0.223808	0.726677	0.823228
PC O-16:0;0/16:1;0	-0.100807	-0.201734	0.000120676	0.0502746	0	0.481222	0.0857314	-0.127727	-0.246874	-0.00858044	0.0356311	0.095137
Chol	-0.129502	-0.259657	0.000651981	0.0511587	0.363331	0.0763306	0.0863303	-0.179472	-0.299	-0.0599443	0.00325151	0.0169917
PE O-16:1;0/20:4;0	-0.111202	-0.223515	0.00111117	0.0523101	0.164421	0.121837	0.0873632	-0.12921	-0.321366	0.062946	0.187529	0.323189
PC 16:0;0_22:4;0	-0.158223	-0.32308	0.00663384	0.059959	0.596572	0.0259775	0.0988086	-0.167942	-0.374221	0.0383374	0.110556	0.220283
CE 20:4;0	-0.161572	-0.330196	0.00705289	0.060383	0.615161	0.0226262	0.0988086	-0.0967512	-0.279041	0.0855383	0.298218	0.443223
PE 16:0;0_18:2;0	0.215511	-0.0113902	0.442413	0.0626629	0.788736	0.0020922	0.101514	-0.20046	-0.316323	-0.0845971	0.000696305	0.00537149
PI 18:1;0_18:2;0	-0.107239	-0.221534	0.00705571	0.0659195	0.19497	0.114982	0.105732	-0.0493583	-0.219971	0.121255	0.570702	0.711183
SM 34:2;2	-0.192797	-0.402878	0.0172832	0.0720632	0.751519	0.00455313	0.114453	-0.167064	-0.370537	0.0364083	0.10756	0.217809
PE 18:0;0_20:4;0	0.258196	-0.0238802	0.540273	0.0728074	0.863457	0.000129611	0.114513	-0.146815	-0.28391	-0.00972023	0.0358232	0.095137
DAG 18:1;0_18:3;0	0.170782	-0.0206384	0.362203	0.0803521	0.701663	0.00962057	0.124484	-0.123596	-0.240944	-0.00624931	0.0389853	0.0971635
LPE 18:2;0	-0.150852	-0.320119	0.0184153	0.0806841	0.632912	0.0195876	0.124484	-0.124441	-0.24247	-0.00641165	0.0387875	0.0971635
PE 18:0;0_18:2;0	0.243261	-0.0404497	0.526972	0.0928553	0.865062	0.000118175	0.141911	-0.273219	-0.38783	-0.158608	2.97814e-06	8.04099e-05
PE 16:0;0_20:4;0	0.175507	-0.0444385	0.395452	0.117825	0.773684	0.0029515	0.17839	-0.166589	-0.28383	-0.0493481	0.00535383	0.0228242
PC 18:1;0_18:1;0	-0.125202	-0.282873	0.0324697	0.119626	0.559584	0.0330891	0.179439	-0.0897836	-0.301167	0.1216	0.405137	0.554813
CE 22:6;0	0.079817	-0.021202	0.180836	0.121477	0	0.765788	0.179967	0.180839	0.0618104	0.299867	0.00290367	0.0156798
PC 16:0;0_18:0;0	-0.122662	-0.278209	0.0328842	0.1222	0.550514	0.034911	0.179967	-0.271902	-0.394605	-0.149198	1.40478e-05	0.000227574
PI 16:0;0_18:1;0	0.100353	-0.031136	0.231843	0.134691	0.380895	0.0722798	0.196577	-0.0890342	-0.207631	0.0295625	0.141182	0.269076
PE O-18:1;0/20:4;0	-0.137096	-0.317584	0.0433923	0.136551	0.663577	0.0147599	0.197512	-0.0735348	-0.30683	0.15976	0.536719	0.684633
LPC 16:0;0	-0.146131	-0.342978	0.0507164	0.145671	0.717141	0.00783561	0.208839	-0.014785	-0.132081	0.102511	0.804869	0.859335
PC 16:0;0_18:3;0	-0.134021	-0.316736	0.0486943	0.15054	0.671757	0.0135715	0.213925	-0.265734	-0.384842	-0.146626	1.22702e-05	0.000220863
PE 18:1;0_18:1;0	0.213514	-0.081531	0.508559	0.156086	0.875534	6.10859e-05	0.218031	-0.273936	-0.406924	-0.140947	5.40879e-05	0.000796567
Cer 42:1;2	-0.0937135	-0.223223	0.0357958	0.156121	0.356487	0.0779114	0.218031	-0.135048	-0.254759	-0.0153384	0.0270294	0.0794242
CE 18:0;0	-0.0788805	-0.192528	0.0347672	0.173713	0.179755	0.118405	0.240525	-0.152175	-0.272102	-0.0322487	0.0128823	0.0444029
LPC 20:3;0	-0.145257	-0.360569	0.0700539	0.186079	0.764303	0.00357995	0.255464	-0.0732161	-0.282847	0.136415	0.493634	0.644909
SM 32:1;2	-0.0948403	-0.241171	0.05149	0.203977	0.492355	0.0471575	0.277683	-0.0790409	-0.198112	0.0400298	0.19324	0.329525
PC 16:0;0_20:2;0	-0.103516	-0.273049	0.066016	0.231403	0.620328	0.0217247	0.312394	-0.171324	-0.318644	-0.0240044	0.0226479	0.0687037
PC 16:0;0_20:4;0	-0.101325	-0.277684	0.0750335	0.260133	0.645107	0.0176004	0.348277	-0.136612	-0.385348	0.112125	0.281722	0.434657
CE 20:5;0	-0.0559896	-0.157447	0.0454676	0.279424	0	0.267374	0.370697	0.0471532	-0.0723417	0.166648	0.43928	0.592357
LPE 20:4;0	-0.120452	-0.339643	0.0987394	0.281455	0.773356	0.00297225	0.370697	-0.0106224	-0.236968	0.215723	0.926713	0.962356
CE 17:1;0	-0.0546602	-0.155835	0.0465149	0.289655	0	0.298462	0.375504	-0.0187387	-0.138272	0.100794	0.758649	0.846473
PC 18:0;0_20:3;0	0.161101	-0.137147	0.45935	0.289741	0.878696	4.89719e-05	0.375504	-0.22902	-0.357387	-0.100653	0.000470931	0.0044877
PC O-16:1;0/18:0;0	-0.054331	-0.155464	0.0468023	0.292371	0	0.373255	0.375905	0.0358791	-0.0837396	0.155498	0.556611	0.699
PC 16:0;0_16:0;0	-0.0901561	-0.26215	0.0818382	0.304244	0.626207	0.0207157	0.388091	-0.172375	-0.318518	-0.0262317	0.0207907	0.066041
PC 18:0;0_18:2;0	-0.101143	-0.297985	0.0956997	0.313896	0.718231	0.00771692	0.397275	-0.308313	-0.430834	-0.185793	8.13546e-07	4.39315e-05
PC 18:0;0_18:3;0	-0.0795925	-0.235792	0.0766074	0.317935	0.552433	0.0345231	0.399268	-0.229988	-0.349517	-0.110458	0.000162471	0.00202464
PI 16:0;0_18:2;0	0.0528524	-0.0687611	0.174466	0.394332	0.308025	0.0891156	0.491399	-0.204591	-0.321186	-0.0879953	0.00058352	0.00472651
PC 16:0;0_20:1;0	-0.0831072	-0.281883	0.115668	0.412528	0.721563	0.00735997	0.510149	-0.0663894	-0.351072	0.218294	0.647619	0.782942
PC 16:1;0_18:1;0	-0.0781794	-0.267959	0.1116	0.419434	0.697658	0.0101122	0.510994	-0.132771	-0.29989	0.0343491	0.119442	0.233127
LPC 18:0;0	-0.113283	-0.388328	0.161762	0.41952	0.856501	0.000189004	0.510994	-0.0317783	-0.148472	0.0849149	0.593518	0.722932
PC 18:0;0_20:5;0	0.058393	-0.0866312	0.203417	0.430015	0.47793	0.0503157	0.519869	0.0337623	-0.0862579	0.153783	0.581395	0.718162
CE 20:3;0	-0.068006	-0.245628	0.109616	0.453008	0.654937	0.0160623	0.540546	-0.203195	-0.32233	-0.0840592	0.000829168	0.00610569
PI 18:0;0_18:2;0	-0.0386173	-0.139655	0.0624208	0.453791	0	0.828628	0.540546	-0.174385	-0.293503	-0.0552666	0.0041136	0.0198149
PC 16:0;0_17:1;0	-0.0376592	-0.151818	0.0764994	0.517915	0.189753	0.116157	0.608778	-0.184642	-0.303801	-0.0654834	0.002389	0.0133454
SM 34:0;2	-0.0482677	-0.19482	0.0982849	0.518589	0.494253	0.0467448	0.608778	-0.128693	-0.248472	-0.00891435	0.035219	0.095137
CE 14:0;0	-0.0322835	-0.13384	0.0692732	0.533254	0	0.163988	0.62149	-0.0633197	-0.183429	0.0567894	0.30148	0.443998
LPC 16:1;0	-0.0743614	-0.314982	0.16626	0.54471	0.813327	0.00106332	0.627727	-0.128551	-0.313002	0.0559	0.171947	0.306104
PC 18:1;0_20:3;0	-0.0863326	-0.367603	0.194937	0.547448	0.862469	0.000137059	0.627727	-0.158509	-0.411327	0.0943097	0.219135	0.358584
PC 18:0;0_22:5;0	-0.0471564	-0.201864	0.107551	0.55023	0.542932	0.0364546	0.627727	-0.159434	-0.279142	-0.0397258	0.00904393	0.0340725
PC 17:0;0_20:4;0	-0.0634104	-0.28259	0.15577	0.570693	0.769637	0.0032138	0.646519	-0.0324711	-0.296108	0.231166	0.809244	0.859335
PC 17:0;0_20:3;0	0.0632835	-0.164193	0.29076	0.585576	0.789194	0.00206886	0.658773	-0.171411	-0.290546	-0.0522762	0.00480249	0.0212232
PI 18:0;0_20:4;0	-0.0551767	-0.264116	0.153763	0.604747	0.746616	0.00496224	0.675648	-0.168118	-0.339315	0.00307872	0.0542648	0.131207
PC 16:0;0_18:1;0	-0.0471276	-0.2317	0.137445	0.616761	0.678543	0.0126196	0.684352	-0.141828	-0.35123	0.0675742	0.184349	0.321125
PC 17:0;0_18:1;0	-0.0290097	-0.148558	0.0905385	0.634355	0.248819	0.102741	0.693305	-0.0617124	-0.207754	0.0843292	0.407548	0.554813
PC 16:0;0_20:3;0	-0.0409112	-0.210112	0.12829	0.635571	0.619552	0.0218592	0.693305	-0.269191	-0.387763	-0.150618	8.60231e-06	0.000174197
PI 18:0;0_18:1;0	-0.0240291	-0.125234	0.0771757	0.641677	0	0.19724	0.693305	-0.196554	-0.315429	-0.0776788	0.00119237	0.0082716
PI 18:0;0_20:3;0	0.0314061	-0.100977	0.163789	0.641949	0.386102	0.0710814	0.693305	-0.0646709	-0.184252	0.0549102	0.289157	0.441919
PC O-17:0;0/17:1;0	-0.0233813	-0.124631	0.0778683	0.65083	0	0.925383	0.698242	0.0262303	-0.0936461	0.146107	0.668023	0.786044
PC 18:0;0_18:1;0	0.0649563	-0.227326	0.357238	0.663142	0.872607	7.42481e-05	0.70677	-0.185859	-0.378761	0.00704253	0.0589711	0.138454
Cer 40:2;2	0.0229016	-0.118833	0.164636	0.751476	0.457207	0.0549157	0.795681	-0.00709906	-0.13767	0.123472	0.915136	0.956465
PC 18:0;0_20:4;0	0.0317326	-0.230542	0.294007	0.812551	0.840268	0.000402413	0.854762	-0.0621155	-0.341136	0.216905	0.6626	0.786044
Cer 40:1;2	0.0158232	-0.139704	0.171351	0.841947	0.545991	0.0358295	0.87997	-0.111258	-0.230984	0.00846821	0.0685558	0.156423
CE 16:1;0	0.0132491	-0.181677	0.208175	0.894021	0.713392	0.00825097	0.928406	-0.212094	-0.330445	-0.0937436	0.000444049	0.0044877
CE 15:0;0	0.00620459	-0.0984915	0.110901	0.907531	0.0538069	0.145983	0.936119	0.0906565	-0.0282101	0.209523	0.134963	0.260286
Cer 42:2;2	0.00565621	-0.0958184	0.107131	0.913005	0	0.219528	0.936119	0.0557653	-0.0641298	0.17566	0.361972	0.509908
PC 14:0;0_18:1;0	-0.00397459	-0.13412	0.126171	0.95227	0.362261	0.0765776	0.970237	-0.0639822	-0.183892	0.0559274	0.295648	0.443223
LPE 18:1;0	0.00625444	-0.275533	0.288042	0.965301	0.863662	0.000128111	0.977367	-0.173637	-0.294446	-0.0528273	0.00484726	0.0212232
PC 16:0;0_20:5;0	-0.00141046	-0.122959	0.120138	0.981855	0.272646	0.0972732	0.987953	0.0279967	-0.0984845	0.154478	0.664405	0.786044
PC 16:0;0_16:1;0	0.000167392	-0.234177	0.234512	0.998883	0.802532	0.00146015	0.998883	-0.273673	-0.424737	-0.12261	0.000384135	0.00444499

## Sheet: MOD
MOD
Unadjusted model								Adjusted model
Variable	Effect	Lower	Upper	P-value	I2	Heterogeneity	P-value (FDR)	Effect	Lower	Upper	P-value	P-value (FDR)
CE 22:6;0	-0.368967	-0.46391	-0.274024	2.60063e-14	0	0.567128	4.21302e-12	-0.403289	-0.520862	-0.285717	1.78103e-11	2.88528e-09
PC O-16:1;0/18:1;0	-0.321223	-0.414312	-0.228134	1.34927e-11	0	0.176269	1.09291e-09	-0.166346	-0.280704	-0.0519875	0.00435863	0.0462377
PC 18:0;0_20:3;0	0.313643	0.218675	0.408612	9.60848e-11	0	0.243466	5.18858e-09	-0.00435869	-0.170377	0.16166	0.958961	0.976358
PC 16:0;0_20:3;0	0.26511	0.169743	0.360478	5.08039e-08	0	0.707171	2.05756e-06	0.0820095	-0.0572116	0.221231	0.248281	0.490506
PC 16:0;0_22:6;0	-0.352398	-0.483007	-0.221789	1.23521e-07	0.470788	0.0518934	3.95664e-06	-0.370933	-0.5046	-0.237266	5.35795e-08	2.89329e-06
CE 15:0;0	-0.257938	-0.354108	-0.161769	1.46542e-07	0.00539659	0.156178	3.95664e-06	-0.154494	-0.273515	-0.035473	0.0109556	0.0739505
PC O-16:0;0/18:2;0	-0.25118	-0.347011	-0.15535	2.7877e-07	0	0.370148	5.91471e-06	-0.0551288	-0.173397	0.0631391	0.360923	0.614231
CE 20:2;0	-0.250406	-0.346105	-0.154708	2.92084e-07	0	0.398204	5.91471e-06	0.0159133	-0.101732	0.133559	0.790922	0.944721
PC O-18:2;0/16:0;0	-0.238543	-0.334528	-0.142558	1.11072e-06	0	0.360075	1.9993e-05	-0.0620875	-0.180711	0.0565359	0.304964	0.542904
CE 20:5;0	-0.250264	-0.363518	-0.13701	1.48401e-05	0.28163	0.0952054	0.000240409	-0.319096	-0.437779	-0.200413	1.36682e-07	4.4285e-06
PC 16:0;0_20:5;0	-0.218609	-0.31863	-0.118587	1.83783e-05	0.0753792	0.141364	0.00025621	-0.30724	-0.438244	-0.176236	4.29367e-06	0.000115929
LPC 18:2;0	-0.245901	-0.358597	-0.133204	1.89785e-05	0.282118	0.095093	0.00025621	0.25147	0.0916412	0.411299	0.00204409	0.0294086
TAG 52:4;0	0.287092	0.152443	0.421741	2.92862e-05	0.491345	0.0473773	0.000364951	0.171541	0.0524452	0.290637	0.00475686	0.0462377
SM 32:1;2	-0.199684	-0.295521	-0.103848	4.4313e-05	0	0.186921	0.000512765	-0.250189	-0.371368	-0.129009	5.19778e-05	0.00120292
DAG 16:0;0_18:2;0	0.255275	0.132188	0.378362	4.80619e-05	0.392371	0.0696401	0.000519068	0.135187	0.0161291	0.254244	0.0260486	0.149528
TAG 50:1;0	0.415468	0.212834	0.618102	5.85492e-05	0.780656	0.00253092	0.000592811	0.0927696	-0.0235513	0.20909	0.118021	0.348954
TAG 50:3;0	0.326414	0.160007	0.492821	0.000120778	0.669093	0.0139537	0.00115094	0.088306	-0.0298348	0.206447	0.14292	0.385884
CE 20:3;0	0.213673	0.104313	0.323033	0.000128423	0.237887	0.10524	0.00115581	0.00770362	-0.234417	0.249824	0.950276	0.976358
PC 18:1;0_20:3;0	0.183559	0.0876852	0.279432	0.000175057	0	0.333848	0.00141817	0.124327	0.00536085	0.243293	0.0405322	0.186306
PC O-18:1;0/18:2;0	-0.216433	-0.330054	-0.102811	0.000188871	0.288956	0.0935171	0.00141817	-0.00157958	-0.120013	0.116854	0.979145	0.979145
TAG 50:2;0	0.378922	0.179756	0.578087	0.000192297	0.771529	0.00308948	0.00141817	0.0724044	-0.044547	0.189356	0.224973	0.472002
TAG 52:5;0	0.242906	0.115219	0.370594	0.000192591	0.431714	0.0606562	0.00141817	0.128178	0.00867478	0.247681	0.0355324	0.169301
PE 18:1;0_18:1;0	0.294662	0.13835	0.450974	0.000220146	0.627989	0.0204135	0.00155059	0.196988	-0.00997298	0.403949	0.0621089	0.251541
PC 18:0;0_20:5;0	-0.176187	-0.272625	-0.079749	0.000342615	0	0.59599	0.00223632	-0.324833	-0.44384	-0.205827	8.80486e-08	3.56597e-06
TAG 52:3;0	0.3461	0.156558	0.535643	0.000345111	0.744957	0.00510513	0.00223632	0.166099	0.0476296	0.284568	0.00599689	0.0511313
DAG 16:1;0_18:1;0	0.295265	0.131253	0.459277	0.000417986	0.661102	0.0151282	0.00260437	0.00877219	-0.108865	0.126409	0.883799	0.960473
TAG 54:4;0	0.304691	0.133277	0.476105	0.000494233	0.686134	0.0115925	0.0029654	0.257898	0.100056	0.415741	0.001363	0.0220806
PI 16:0;0_18:2;0	0.163058	0.0696314	0.256484	0.000624506	0	0.406702	0.00361322	0.0204559	-0.0953192	0.136231	0.729118	0.903729
PC 17:0;0_20:3;0	0.165057	0.0693104	0.260803	0.000728094	0	0.349091	0.00400143	0.0137645	-0.124617	0.152146	0.84543	0.960473
PC O-17:0;0/17:1;0	-0.165459	-0.261576	-0.0693418	0.000741005	0	0.360305	0.00400143	-0.141467	-0.261157	-0.0217773	0.0205269	0.127898
TAG 54:3;0	0.375378	0.156581	0.594176	0.000772109	0.809429	0.00119712	0.00403489	0.240007	0.0650061	0.415009	0.00718785	0.0543285
TAG 50:4;0	0.247012	0.102649	0.391374	0.00079767	0.555973	0.0338111	0.00403821	0.0906026	-0.0286659	0.209871	0.136516	0.37484
TAG 51:3;0	0.207708	0.0856529	0.329764	0.000851843	0.376836	0.073215	0.00418177	0.0679117	-0.0514969	0.18732	0.26498	0.509235
TAG 51:2;0	0.268911	0.109021	0.428801	0.000979459	0.639866	0.0184438	0.00459464	0.0447062	-0.0738046	0.163217	0.459686	0.71605
PC O-16:1;0/18:2;0	-0.267114	-0.426117	-0.10811	0.00099267	0.640551	0.0183328	0.00459464	-0.00452605	-0.170774	0.161722	0.957446	0.976358
PC 16:0;0_22:5;0	-0.161403	-0.2579	-0.0649064	0.00104439	0	0.303651	0.00469975	-0.0811686	-0.200262	0.0379249	0.181608	0.432655
PC 18:0;0_22:6;0	-0.20453	-0.327501	-0.0815582	0.00111464	0.393624	0.0693523	0.00487847	-0.388486	-0.527172	-0.2498	4.01409e-08	2.89329e-06
TAG 52:2;0	0.394759	0.156869	0.632649	0.00114433	0.83977	0.000410872	0.00487847	0.132826	0.0153397	0.250312	0.0267005	0.149528
TAG 54:5;0	0.27042	0.107045	0.433796	0.00117803	0.654199	0.0161757	0.00489335	0.212744	0.0745216	0.350966	0.00255573	0.0318483
DAG 18:1;0_18:2;0	0.266483	0.102196	0.43077	0.00147696	0.657915	0.015608	0.0059817	0.164735	0.0454265	0.284044	0.0068055	0.0543285
SM 34:1;2	-0.244489	-0.399243	-0.0897344	0.00195854	0.620451	0.0217033	0.00764763	-0.121825	-0.239557	-0.00409203	0.0425514	0.186306
PI 18:0;0_20:4;0	0.156892	0.0574671	0.256318	0.00198272	0.0592648	0.144819	0.00764763	0.0396218	-0.0905726	0.169816	0.55086	0.782802
DAG 16:0;0_18:1;0	0.34007	0.123676	0.556464	0.00206895	0.80426	0.00139103	0.00774702	0.0993772	-0.0190827	0.217837	0.100128	0.32133
TAG 53:4;0	0.15156	0.0549616	0.248158	0.00210413	0	0.221778	0.00774702	0.112082	-0.00800071	0.232166	0.0673429	0.25371
TAG 51:1;0	0.267461	0.0926501	0.442272	0.0027109	0.698621	0.00999288	0.00975923	0.039378	-0.0791725	0.157929	0.51503	0.761494
CE 16:1;0	0.145583	0.0498998	0.241267	0.00286276	0	0.794255	0.0100299	-0.111936	-0.258114	0.0342418	0.133395	0.372586
DAG 18:1;0_18:1;0	0.35667	0.121857	0.591482	0.0029099	0.8346	0.000506406	0.0100299	0.170261	0.028046	0.312475	0.0189513	0.122805
PE 18:0;0_18:2;0	0.238377	0.0800645	0.39669	0.00316553	0.634387	0.0193427	0.0104991	0.108249	-0.0106934	0.227191	0.0744635	0.266784
CE 17:0;0	-0.244831	-0.407818	-0.0818439	0.00323832	0.654702	0.0160984	0.0104991	-0.0305111	-0.224446	0.163424	0.757813	0.92305
TAG 48:1;0	0.307513	0.102783	0.512242	0.00324045	0.782343	0.00243504	0.0104991	0.0358151	-0.0818193	0.15345	0.550685	0.782802
DAG 18:1;0_18:3;0	0.197454	0.0625002	0.332407	0.00413506	0.495939	0.046379	0.0131349	0.132229	0.0129113	0.251547	0.0298518	0.156
PC O-16:0;0/18:1;0	-0.137264	-0.233684	-0.0408445	0.00526713	0	0.171032	0.0161709	0.00973541	-0.109739	0.12921	0.873111	0.960473
TAG 53:3;0	0.213995	0.0635992	0.36439	0.00529048	0.588765	0.0274323	0.0161709	0.105418	-0.0142269	0.225062	0.0841846	0.278325
LPE 18:2;0	-0.131073	-0.225214	-0.0369309	0.00635576	0	0.506394	0.0190673	0.153389	0.0379424	0.268836	0.00921107	0.064878
TAG 53:2;0	0.253836	0.069619	0.438052	0.00691993	0.727791	0.00671636	0.0203823	0.0765065	-0.0426421	0.195655	0.208207	0.455804
TAG 48:0;0	0.306157	0.0735931	0.538722	0.00987493	0.83172	0.000565886	0.0285668	0.0513107	-0.0663509	0.168972	0.392709	0.649172
PC 18:0;0_18:2;0	0.124171	0.0282246	0.220118	0.0111959	0	0.405804	0.0318199	0.0951198	-0.0242941	0.214534	0.118472	0.348954
TAG 56:6;0	0.218722	0.0419204	0.395524	0.0153219	0.703866	0.00935539	0.0427957	0.0992878	-0.0203243	0.2189	0.103752	0.323227
TAG 56:5;0	0.263546	0.049238	0.477855	0.0159406	0.799621	0.00158155	0.0437692	0.107486	-0.0210286	0.236	0.10116	0.32133
TAG 49:1;0	0.217362	0.0392054	0.395519	0.0167899	0.709282	0.00871896	0.0453327	0.00751884	-0.111167	0.126205	0.901185	0.960473
TAG 48:2;0	0.256315	0.0449645	0.467666	0.0174568	0.794702	0.00180113	0.0463607	0.0346914	-0.0836367	0.15302	0.565547	0.795424
CE 14:0;0	-0.145631	-0.268746	-0.0225171	0.0204258	0.387474	0.0707657	0.0533707	-0.130562	-0.333056	0.0719328	0.206331	0.455804
PC O-18:1;0/16:0;0	-0.13023	-0.241168	-0.0192926	0.0214022	0.246059	0.103372	0.0548056	0.0308437	-0.0884446	0.150132	0.612311	0.829021
SM 40:1;2	0.191088	0.0279973	0.354179	0.0216516	0.657318	0.0156987	0.0548056	0.179026	-0.0104822	0.368534	0.0640901	0.252137
LPC 18:1;0	-0.220811	-0.410949	-0.0306738	0.0228368	0.747795	0.00486201	0.0569164	0.155337	-0.0770105	0.387685	0.19008	0.446274
TAG 56:4;0	0.23933	0.0229742	0.455687	0.0301521	0.802523	0.00146054	0.0740097	0.172576	-0.00814745	0.353299	0.0612614	0.251541
PC 18:0;0_20:4;0	0.132679	0.0112938	0.254064	0.0321677	0.370872	0.0745902	0.0777786	-0.0132882	-0.15899	0.132414	0.858133	0.960473
SM 36:2;2	0.156322	0.00990468	0.30274	0.0363894	0.569032	0.0312219	0.0859744	-0.167643	-0.285062	-0.0502229	0.00513752	0.0462377
PC O-18:2;0/18:1;0	-0.128124	-0.248497	-0.00775073	0.0369637	0.361801	0.0766838	0.0859744	0.0439322	-0.107477	0.195341	0.569563	0.795424
TAG 49:2;0	0.18303	0.0109034	0.355157	0.0371495	0.687767	0.0113769	0.0859744	0.0022577	-0.116717	0.121232	0.970331	0.976358
TAG 51:4;0	0.108411	0.00499142	0.21183	0.0399216	0.127167	0.130093	0.0910886	0.0850387	-0.0350224	0.2051	0.165066	0.427412
PC 16:0;0_18:0;0	0.100191	0.00416558	0.196216	0.0408561	0	0.912786	0.091324	0.067616	-0.0518238	0.187056	0.267191	0.509235
TAG 54:6;0	0.172246	0.00691936	0.337574	0.0411522	0.660156	0.0152699	0.091324	0.0830663	-0.0726527	0.238785	0.295784	0.535091
PC 16:1;0_18:2;0	0.0957334	0.000129303	0.191338	0.0496909	0	0.409519	0.108783	0.162174	0.0435397	0.280809	0.00737794	0.0543285
PI 18:0;0_20:3;0	0.0955247	-0.000406974	0.191456	0.0509799	0	0.707417	0.110117	0.0217928	-0.097471	0.141057	0.720239	0.903729
PI 18:0;0_18:2;0	0.0950862	-0.00103007	0.191202	0.0525063	0	0.478317	0.111921	0.0739572	-0.0457034	0.193618	0.225753	0.472002
TAG 56:3;0	0.248163	-0.00370268	0.500029	0.0534644	0.854601	0.000208239	0.112484	0.157911	-0.0183175	0.33414	0.0790471	0.266784
PE 18:0;0_20:4;0	0.205493	-0.00464347	0.41563	0.0552819	0.791887	0.00193502	0.114816	0.0332054	-0.0855141	0.151925	0.583559	0.807417
PC O-16:1;0/20:4;0	-0.101639	-0.206427	0.00314911	0.0572938	0.159133	0.123016	0.117489	-0.00841123	-0.127209	0.110386	0.889631	0.960473
PC 16:0;0_22:4;0	0.119075	-0.00509086	0.243242	0.060162	0.398506	0.0682318	0.121828	0.143631	-0.0630093	0.350271	0.173095	0.431406
TAG 50:5;0	0.152706	-0.00972874	0.315141	0.065391	0.648039	0.0171354	0.12969	0.0605246	-0.0591388	0.180188	0.321524	0.566162
Cer 42:2;2	-0.120962	-0.249752	0.00782794	0.0656456	0.440442	0.058682	0.12969	-0.0564189	-0.208339	0.0955011	0.466689	0.720034
PC 17:0;0_18:1;0	-0.13171	-0.274164	0.0107439	0.0699641	0.54141	0.0367666	0.13554	-0.134425	-0.254323	-0.0145276	0.0279886	0.151138
PC 16:0;0_17:1;0	0.0941167	-0.00779206	0.196025	0.0702798	0.11031	0.133789	0.13554	0.0651769	-0.0544394	0.184793	0.285542	0.525658
LPE 20:4;0	-0.123218	-0.259798	0.0133617	0.0770241	0.508074	0.0437638	0.146799	0.0730102	-0.104086	0.250107	0.419079	0.678908
PC 16:0;0_20:4;0	0.118577	-0.0193408	0.256496	0.0919672	0.510736	0.0431946	0.169656	0.048528	-0.0708234	0.167879	0.425499	0.682484
PC 18:2;0_18:2;0	-0.0827241	-0.178977	0.0135284	0.0920871	0	0.285258	0.169656	0.202901	0.0843391	0.321463	0.000795987	0.0143278
PE O-16:1;0/20:4;0	0.0857476	-0.0140448	0.18554	0.0921587	0.0679278	0.142965	0.169656	0.00802218	-0.111531	0.127575	0.895367	0.960473
TAG 48:3;0	0.183548	-0.0316122	0.398707	0.0945248	0.800522	0.00154333	0.172056	0.0547589	-0.064407	0.173925	0.36778	0.614231
PC 16:0;0_20:1;0	-0.109211	-0.238978	0.0205558	0.0990464	0.449668	0.0566048	0.177341	-0.0991388	-0.251257	0.0529789	0.201476	0.454473
Cer 40:2;2	-0.0809137	-0.177219	0.0153921	0.0996172	0	0.172196	0.177341	-0.0712292	-0.190954	0.0484953	0.243588	0.487176
TAG 46:1;0	0.195071	-0.0380699	0.428212	0.101022	0.830816	0.000585521	0.177887	0.0188504	-0.0998235	0.137524	0.755554	0.92305
TAG 52:6;0	0.114991	-0.0250831	0.255064	0.107618	0.524311	0.0403185	0.187464	-0.00951847	-0.129549	0.110512	0.876486	0.960473
CE 18:3;0	0.0779719	-0.0184618	0.174406	0.113026	0	0.226464	0.194253	0.0100986	-0.165678	0.185875	0.910346	0.962498
PC 16:0;0_16:1;0	0.147298	-0.0361598	0.330755	0.115568	0.729283	0.0065668	0.194253	-0.0431716	-0.161069	0.0747259	0.472944	0.722454
SM 34:0;2	0.0770249	-0.0190041	0.173054	0.11593	0	0.175412	0.194253	-0.0611798	-0.193736	0.071376	0.365677	0.614231
SM 36:1;2	0.106176	-0.0266733	0.239025	0.117245	0.476751	0.0505757	0.194253	-0.10668	-0.224861	0.0115003	0.0768543	0.266784
PC O-18:2;0/18:2;0	-0.128635	-0.289702	0.0324325	0.117511	0.644227	0.0177409	0.194253	0.0928507	-0.025697	0.211398	0.124756	0.360902
PI 18:0;0_18:1;0	0.0746261	-0.0214948	0.170747	0.128091	0	0.256429	0.209604	0.0129258	-0.106355	0.132206	0.831802	0.960473
CE 18:0;0	0.0712463	-0.0252007	0.167693	0.147661	0	0.217176	0.239211	0.0732015	-0.0467413	0.193144	0.231629	0.474986
PE 16:0;0_18:2;0	0.143172	-0.0552035	0.341548	0.157201	0.766796	0.00340586	0.252144	0.0294716	-0.0955732	0.154516	0.644124	0.848358
CE 17:1;0	-0.115047	-0.283062	0.0529688	0.179576	0.675137	0.0130934	0.285208	-0.18227	-0.447115	0.0825742	0.177376	0.432655
SM 34:2;2	0.102703	-0.0498068	0.255212	0.186877	0.6008	0.0252009	0.293923	-0.205549	-0.323335	-0.0877633	0.000625402	0.0126644
DAG 18:2;0_18:2;0	0.118062	-0.0621975	0.298322	0.19925	0.716357	0.00792158	0.310371	0.130466	0.0109371	0.249994	0.032411	0.164081
PE 16:0;0_20:4;0	0.12359	-0.066492	0.313673	0.202537	0.744607	0.00513554	0.312486	-0.0209582	-0.140344	0.098428	0.730793	0.903729
PC 16:0;0_16:0;0	-0.0638388	-0.165739	0.0380618	0.219492	0.100076	0.136021	0.33545	-0.0821404	-0.202225	0.0379438	0.18003	0.432655
PE O-18:1;0/18:2;0	-0.0971669	-0.258522	0.064188	0.237889	0.646858	0.0173221	0.360169	0.0794543	-0.061927	0.220836	0.270691	0.509907
TAG 46:2;0	0.151343	-0.102187	0.404873	0.242005	0.856506	0.000188952	0.362428	0.0329037	-0.0861774	0.151985	0.588118	0.807417
LPC 20:4;0	-0.0773927	-0.207551	0.0527656	0.243856	0.452155	0.0560468	0.362428	0.124295	0.00474785	0.243841	0.0415695	0.186306
PC 18:0;0_18:3;0	0.0565667	-0.0396506	0.152784	0.249208	0	0.775457	0.367016	-0.0480533	-0.167504	0.0713971	0.430423	0.683613
PC 16:0;0_18:2;0	0.0543	-0.0419665	0.150567	0.268928	0	0.370163	0.392489	0.114	-0.00553577	0.233536	0.0615954	0.251541
PC O-18:1;0/20:3;0	0.0998367	-0.0828819	0.282555	0.284207	0.724041	0.0071002	0.40925	0.128383	0.00953169	0.247235	0.0342472	0.168122
PC 18:0;0_18:1;0	0.0668967	-0.0558561	0.18965	0.285465	0.387999	0.070645	0.40925	-0.0859819	-0.20514	0.0331759	0.157282	0.417701
PC O-18:1;0/20:4;0	0.0577895	-0.0507872	0.166366	0.296864	0.211273	0.111295	0.421859	0.135033	0.015542	0.254524	0.0267674	0.149528
CE 20:4;0	0.050469	-0.0458566	0.146795	0.304464	0	0.427355	0.428897	0.00805161	-0.139744	0.155847	0.914968	0.962498
PI 18:1;0_18:1;0	0.0489664	-0.0473246	0.145258	0.318915	0	0.350072	0.445381	0.115842	-0.0133075	0.244992	0.0787458	0.266784
PC 18:0;0_22:5;0	0.0484097	-0.0484559	0.145275	0.327326	0.0129656	0.154599	0.45322	0.00619246	-0.138449	0.150834	0.933127	0.975268
PC O-16:0;0/20:4;0	0.0462835	-0.0501429	0.14271	0.346828	0	0.378485	0.476154	0.0155621	-0.104176	0.135301	0.798931	0.944721
PC O-18:0;0/14:0;0	-0.0510254	-0.158515	0.0564645	0.352167	0.194099	0.115178	0.477049	0.0719772	-0.0477751	0.191729	0.238782	0.483533
PC O-16:0;0/20:3;0	0.0569036	-0.0638185	0.177626	0.355565	0.363821	0.0762175	0.477049	0.0150889	-0.14936	0.179538	0.857282	0.960473
PC O-16:1;0/16:0;0	-0.099612	-0.311271	0.112047	0.356315	0.794177	0.00182561	0.477049	-0.0253658	-0.144339	0.0936075	0.676038	0.876145
PE O-18:2;0/18:2;0	-0.0635742	-0.205206	0.0780574	0.378984	0.540063	0.0370432	0.503241	0.0268889	-0.092086	0.145864	0.657794	0.859376
LPC 16:0;0	-0.104531	-0.346362	0.137301	0.396892	0.842318	0.000368846	0.522735	0.0828325	-0.0355035	0.201169	0.170085	0.430528
TAG 58:7;0	0.0766493	-0.106379	0.259677	0.411759	0.721734	0.00734187	0.537943	-0.0395624	-0.206137	0.127012	0.64157	0.848358
Cer 42:1;2	-0.0375193	-0.1339	0.0588618	0.445478	0	0.481257	0.577339	0.059191	-0.0601684	0.17855	0.331072	0.576706
SM 40:2;2	-0.0459636	-0.171379	0.079452	0.472567	0.41474	0.0645169	0.607587	-0.10627	-0.224778	0.0122371	0.0788193	0.266784
PC O-16:1;0/18:0;0	-0.040876	-0.153787	0.0720348	0.477985	0.278111	0.0960157	0.609713	-0.013409	-0.132406	0.105588	0.825206	0.960473
LPC 20:3;0	0.0370558	-0.0663049	0.140417	0.482264	0.134139	0.128557	0.610365	0.156115	-0.00993223	0.322162	0.0653688	0.252137
LPC 18:0;0	-0.104222	-0.402159	0.193715	0.492953	0.896996	1.05087e-05	0.619058	0.0298696	-0.0879299	0.147669	0.619207	0.829021
PC 14:0;0_18:1;0	-0.0330043	-0.129316	0.0633073	0.50181	0	0.568721	0.625332	-0.0245784	-0.144208	0.095051	0.687181	0.876561
CE 16:0;0	-0.0367801	-0.146092	0.0725321	0.509597	0.223394	0.108543	0.630189	-0.0222031	-0.192991	0.148585	0.798875	0.944721
PC 14:0;0_18:2;0	0.0308788	-0.065567	0.127325	0.530321	0	0.261141	0.650848	0.081209	-0.0589788	0.221397	0.256215	0.500083
TAG 58:8;0	-0.0603001	-0.254225	0.133625	0.542231	0.754673	0.00430046	0.660462	-0.147619	-0.332843	0.037605	0.118278	0.348954
PC O-16:0;0/16:1;0	0.0291204	-0.0669676	0.125208	0.552522	0	0.379457	0.666707	-0.0633818	-0.182566	0.0558028	0.297273	0.535091
PI 16:0;0_18:1;0	0.0288178	-0.0670106	0.124646	0.555589	0	0.477722	0.666707	-0.00819517	-0.127226	0.110835	0.892658	0.960473
PC 18:1;0_20:4;0	0.0262835	-0.0703011	0.122868	0.593782	0	0.185758	0.707299	0.0926055	-0.0269309	0.212142	0.128915	0.36639
PC 16:0;0_18:3;0	0.0244323	-0.0718988	0.120763	0.619117	0	0.237444	0.731007	-0.0395037	-0.15904	0.0800327	0.517168	0.761494
PC 18:2;0_20:4;0	-0.0326591	-0.164426	0.0991082	0.627119	0.461644	0.0539252	0.731007	0.170678	0.0512403	0.290116	0.00509741	0.0462377
PE O-18:2;0/18:1;0	0.0519876	-0.157825	0.261801	0.627222	0.790026	0.00202693	0.731007	0.0703328	-0.123589	0.264255	0.477176	0.722454
TAG 54:7;0	0.0373673	-0.119164	0.193898	0.639866	0.618321	0.0220732	0.740417	-0.0611136	-0.250217	0.12799	0.526465	0.761494
TAG 56:7;0	0.0458981	-0.154281	0.246077	0.65315	0.767955	0.00332669	0.74833	-0.0950126	-0.28906	0.0990348	0.337222	0.581169
SM 42:2;2	-0.0512237	-0.278387	0.175939	0.65852	0.82333	0.000766553	0.74833	-0.0171664	-0.160061	0.125728	0.813855	0.955394
PE O-18:1;0/20:4;0	-0.0215739	-0.117863	0.0747152	0.660563	0	0.52087	0.74833	0.00795742	-0.111419	0.127334	0.896054	0.960473
TAG 56:8;0	-0.0293036	-0.187275	0.128667	0.716177	0.62744	0.0205064	0.804953	-0.134082	-0.338474	0.0703103	0.198533	0.454473
PE O-18:2;0/20:4;0	-0.0216783	-0.140423	0.0970669	0.720483	0.342788	0.0810781	0.804953	-0.0651045	-0.184464	0.0542544	0.28504	0.525658
PC 17:0;0_18:2;0	-0.0171343	-0.113257	0.0789879	0.726808	0	0.830839	0.806458	0.0735685	-0.0458501	0.192987	0.22726	0.472002
CE 18:2;0	-0.0276385	-0.190905	0.135628	0.740046	0.657341	0.0156951	0.815561	0.0625035	-0.130483	0.25549	0.525569	0.761494
PC 17:0;0_20:4;0	0.0147322	-0.0819514	0.111416	0.765207	0	0.212717	0.837591	-0.00430904	-0.124302	0.115684	0.943888	0.976358
PC 16:0;0_20:2;0	-0.0104243	-0.106534	0.0856855	0.831652	0	0.712807	0.904212	-0.0246977	-0.14391	0.094515	0.684704	0.876561
PC 16:1;0_18:1;0	-0.0164172	-0.18089	0.148056	0.844894	0.660534	0.0152132	0.912485	-0.0406336	-0.15964	0.0783726	0.50336	0.75504
SM 38:2;2	0.0094075	-0.147396	0.166211	0.906393	0.623992	0.0210937	0.972422	-0.169934	-0.288873	-0.0509953	0.00510545	0.0462377
PI 18:1;0_18:2;0	0.00422426	-0.0919181	0.100367	0.931374	0	0.789899	0.978472	0.0904696	-0.0485038	0.229443	0.201988	0.454473
CE 18:1;0	-0.00324148	-0.0996108	0.0931278	0.947437	0	0.40201	0.978472	0.00298099	-0.142842	0.148803	0.96804	0.976358
Chol	0.0029539	-0.0934653	0.0993731	0.952119	0	0.279732	0.978472	0.0339381	-0.0980226	0.165899	0.614212	0.829021
LPE 18:1;0	-0.00415126	-0.140258	0.131956	0.952332	0.505286	0.0443617	0.978472	0.186696	-0.0776062	0.450999	0.166216	0.427412
PC O-18:0;0/20:4;0	0.0028593	-0.093465	0.0991836	0.953605	0	0.243764	0.978472	0.0381711	-0.161969	0.238311	0.708547	0.896755
LPC 16:1;0	0.00282211	-0.0928139	0.0984581	0.953879	0	0.428979	0.978472	0.0168953	-0.101609	0.1354	0.779911	0.942878
Cer 40:1;2	-0.00282001	-0.0992928	0.0936528	0.954313	0	0.475223	0.978472	0.00903391	-0.110882	0.12895	0.882615	0.960473
PC 18:1;0_18:1;0	0.00336958	-0.147855	0.154594	0.965166	0.593946	0.0264638	0.980378	0.129725	-0.0746093	0.334058	0.213384	0.46091
PC O-16:0;0/16:0;0	-0.00172951	-0.0981131	0.0946541	0.971944	0	0.538776	0.980378	0.0516877	-0.0681682	0.171544	0.397982	0.651243
PC 16:0;0_18:1;0	-0.0030708	-0.190087	0.183945	0.974326	0.736246	0.00589269	0.980378	-0.0453751	-0.164594	0.0738436	0.455685	0.71605
PC 18:1;0_18:2;0	0.000457397	-0.0955453	0.0964601	0.992549	0	0.624016	0.992549	0.185848	0.0669954	0.304701	0.00217841	0.0294086

## Sheet: MD
MD
Unadjusted model
Variable	Effect	Lower	Upper	P-value	I2	Heterogeneity	P-value (FDR)
PC O-18:2;0/18:1;0	-0.155028	-0.24318	-0.0668753	0.000567144	0	0.231384	0.0918774
PC 18:1;0_18:1;0	-0.156703	-0.253395	-0.0600104	0.00149126	0.167829	0.121076	0.0923589
SM 34:2;2	-0.141371	-0.229715	-0.0530271	0.00171035	0	0.206901	0.0923589
SM 36:2;2	-0.130566	-0.218812	-0.0423201	0.00373277	0	0.442831	0.151177
PI 16:0;0_18:1;0	-0.121778	-0.209506	-0.0340509	0.00651412	0	0.170787	0.180532
PC 16:0;0_16:0;0	-0.122221	-0.210825	-0.0336163	0.00685992	0	0.446748	0.180532
SM 32:1;2	-0.119589	-0.207687	-0.0314914	0.00780078	0	0.681922	0.180532
PC O-18:1;0/20:4;0	-0.117527	-0.20589	-0.0291639	0.00913815	0	0.300176	0.185048
PE O-18:1;0/20:4;0	-0.127421	-0.226324	-0.0285185	0.011566	0.205822	0.11253	0.208188
SM 36:1;2	-0.108669	-0.196827	-0.0205106	0.0156937	0	0.523849	0.254238
PC 16:0;0_16:1;0	-0.103991	-0.191666	-0.0163158	0.0200879	0	0.164863	0.271512
PC 16:1;0_18:1;0	-0.103411	-0.191318	-0.0155048	0.0211297	0	0.831597	0.271512
PE 16:0;0_20:4;0	-0.11356	-0.21207	-0.015051	0.0238571	0.198734	0.114132	0.271512
PC O-18:0;0/20:4;0	-0.101562	-0.18982	-0.0133031	0.024109	0	0.275077	0.271512
PE O-18:2;0/20:4;0	-0.100821	-0.189067	-0.0125744	0.02514	0	0.43326	0.271512
PC O-17:0;0/17:1;0	-0.0965371	-0.184815	-0.00825903	0.0320864	0	0.27945	0.322471
SM 34:0;2	-0.108864	-0.209416	-0.00831188	0.0338395	0.233502	0.106241	0.322471
PI 18:0;0_18:2;0	-0.0930516	-0.181194	-0.00490865	0.0385354	0	0.459952	0.346819
PC O-16:0;0/18:1;0	-0.0910029	-0.179552	-0.00245379	0.0439805	0	0.587018	0.367859
LPC 18:0;0	0.0898232	0.00183296	0.177813	0.0454147	0	0.200024	0.367859
PE 18:0;0_20:4;0	-0.101442	-0.208211	0.00532804	0.0625809	0.317109	0.0870162	0.476263
PI 18:0;0_20:4;0	-0.0946125	-0.196062	0.00683685	0.0675678	0.238416	0.105119	0.476263
PI 18:1;0_18:1;0	-0.0805406	-0.168814	0.00773251	0.0737315	0	0.227798	0.476263
PC O-18:1;0/16:0;0	-0.0804456	-0.168918	0.00802664	0.0747254	0	0.729503	0.476263
PC O-16:0;0/16:1;0	-0.11061	-0.232542	0.0113219	0.0754082	0.479391	0.0499943	0.476263
PC 14:0;0_18:1;0	-0.0798171	-0.168113	0.00847939	0.0764373	0	0.637422	0.476263
PE O-16:1;0/20:4;0	-0.0779429	-0.166321	0.0104347	0.0838894	0	0.299419	0.480806
PE O-18:2;0/18:1;0	-0.0905674	-0.194947	0.0138119	0.0890155	0.285326	0.0943539	0.480806
PC 16:0;0_18:2;0	-0.146682	-0.317072	0.0237068	0.0915519	0.733259	0.00617702	0.480806
PI 16:0;0_18:2;0	-0.100452	-0.219315	0.0184109	0.0976446	0.478614	0.0501651	0.480806
PC 17:0;0_20:4;0	-0.0803608	-0.17585	0.0151283	0.0990558	0.138863	0.127514	0.480806
PC O-16:1;0/20:4;0	-0.0739639	-0.16215	0.0142226	0.100204	0	0.412645	0.480806
TAG 52:5;0	0.0733576	-0.0153552	0.16207	0.105079	0	0.393609	0.480806
PC 18:0;0_20:4;0	-0.0729812	-0.161373	0.0154108	0.105608	0	0.179434	0.480806
PC 16:0;0_18:1;0	-0.12337	-0.273215	0.0264757	0.1066	0.655321	0.0160034	0.480806
TAG 52:6;0	0.0729958	-0.0157274	0.161719	0.106846	0	0.531261	0.480806
PE 16:0;0_18:2;0	-0.113811	-0.257375	0.0297535	0.120241	0.624686	0.0209749	0.526459
TAG 50:4;0	0.0680853	-0.0206055	0.156776	0.132425	0	0.241849	0.562371
CE 16:1;0	-0.0764814	-0.177439	0.0244763	0.1376	0.243426	0.103975	0.562371
PC 18:0;0_18:1;0	-0.0798726	-0.185644	0.0258984	0.138857	0.307028	0.089346	0.562371
PE O-18:1;0/18:2;0	-0.0732014	-0.172493	0.0260898	0.148468	0.214143	0.110645	0.585273
PC 18:1;0_20:4;0	-0.102663	-0.243038	0.0377116	0.151737	0.603086	0.0247846	0.585273
PC 18:1;0_18:2;0	-0.120648	-0.289051	0.0477556	0.160271	0.728112	0.006684	0.593675
PC 16:0;0_20:4;0	-0.133004	-0.319721	0.0537125	0.162671	0.776315	0.00278818	0.593675
PI 18:0;0_18:1;0	-0.0782535	-0.188694	0.0321871	0.16491	0.36335	0.0763263	0.593675
PE 18:1;0_18:1;0	-0.147411	-0.361212	0.0663897	0.176582	0.83156	0.000569341	0.621876
PC O-16:1;0/18:0;0	0.0612798	-0.0322257	0.154785	0.198973	0.115043	0.132754	0.631135
TAG 54:7;0	0.0577152	-0.0310275	0.146458	0.202418	0	0.234268	0.631135
TAG 53:4;0	0.0571807	-0.031575	0.145936	0.206696	0	0.31576	0.631135
PC 16:0;0_18:3;0	-0.0568953	-0.145247	0.0314562	0.206895	0	0.512513	0.631135
PC 18:0;0_18:2;0	-0.0967691	-0.248007	0.0544689	0.209814	0.661832	0.0150192	0.631135
PC 17:0;0_18:2;0	-0.0908159	-0.23331	0.0516784	0.211612	0.618518	0.0220389	0.631135
PC O-16:0;0/20:4;0	-0.0697882	-0.179661	0.0400843	0.213162	0.353024	0.0787116	0.631135
PC 18:1;0_20:3;0	-0.0878575	-0.227273	0.0515584	0.21678	0.601134	0.02514	0.631135
PC 16:1;0_18:2;0	-0.0808084	-0.209352	0.0477349	0.217902	0.535078	0.0380721	0.631135
CE 17:0;0	0.0596341	-0.036038	0.155306	0.221828	0.14833	0.125418	0.631135
PC 17:0;0_18:1;0	-0.0551298	-0.143795	0.0335356	0.222976	0	0.445069	0.631135
LPC 18:2;0	0.0760534	-0.0470542	0.199161	0.225962	0.489436	0.0477934	0.631135
TAG 51:4;0	0.0540915	-0.0346215	0.142805	0.232064	0	0.371749	0.637192
TAG 52:4;0	0.0535785	-0.0351137	0.142271	0.236411	0	0.297146	0.638311
LPE 18:1;0	-0.0715695	-0.194706	0.0515674	0.254633	0.491908	0.0472548	0.669362
PE 18:0;0_18:2;0	-0.101209	-0.275907	0.0734893	0.256176	0.745848	0.00502811	0.669362
CE 14:0;0	0.0527567	-0.0403069	0.14582	0.266533	0.0952992	0.137059	0.674889
SM 38:2;2	-0.069756	-0.193651	0.0541386	0.269805	0.493362	0.0469384	0.674889
LPC 16:0;0	0.0618298	-0.0483143	0.171974	0.27123	0.357569	0.0776616	0.674889
PI 18:0;0_20:3;0	-0.0487419	-0.136769	0.0392856	0.277808	0	0.460348	0.674889
TAG 50:5;0	0.0489302	-0.039679	0.137539	0.279121	0	0.243513	0.674889
SM 40:2;2	-0.0477789	-0.135809	0.0402514	0.287428	0	0.266965	0.675695
PC 16:0;0_20:3;0	-0.106126	-0.301807	0.0895552	0.287796	0.799044	0.00160639	0.675695
PC O-16:0;0/20:3;0	-0.0534498	-0.158457	0.0515574	0.318452	0.292454	0.0927103	0.73699
PC 16:0;0_18:0;0	-0.0838176	-0.25036	0.0827249	0.323931	0.720962	0.00742372	0.73911
LPC 18:1;0	0.0438623	-0.0441953	0.13192	0.328928	0	0.538725	0.739432
PC O-18:1;0/20:3;0	-0.0642249	-0.194307	0.0658569	0.333201	0.540892	0.036873	0.739432
PC O-18:2;0/18:2;0	-0.067388	-0.206106	0.0713296	0.341028	0.595672	0.0261438	0.746574
TAG 56:3;0	-0.050138	-0.155112	0.0548358	0.349208	0.286481	0.0940876	0.746682
TAG 51:1;0	-0.071603	-0.223295	0.0800893	0.354884	0.659722	0.0153351	0.746682
PC O-16:0;0/18:2;0	0.0416989	-0.0466558	0.130054	0.354964	0	0.563261	0.746682
Cer 42:1;2	0.0583807	-0.0667599	0.183521	0.360526	0.501647	0.0451448	0.746682
TAG 54:6;0	0.0406647	-0.0480151	0.129345	0.368784	0	0.433909	0.746682
PC 16:0;0_17:1;0	-0.0425432	-0.135362	0.0502757	0.369003	0.096937	0.136703	0.746682
LPC 20:4;0	0.0578892	-0.0698022	0.185581	0.374242	0.520933	0.0410298	0.746682
CE 20:2;0	-0.0396808	-0.127891	0.0485292	0.37795	0	0.231967	0.746682
CE 18:0;0	0.0712236	-0.0902106	0.232658	0.387191	0.700202	0.00979861	0.753882
TAG 48:0;0	-0.0864125	-0.284253	0.111428	0.391959	0.801658	0.00149596	0.753882
TAG 56:8;0	0.0438868	-0.0581212	0.145895	0.399098	0.247578	0.103025	0.753882
PC 16:0;0_22:6;0	-0.0656649	-0.218653	0.0873229	0.400209	0.668882	0.0139842	0.753882
PC 17:0;0_20:3;0	-0.0727962	-0.247927	0.102335	0.415249	0.748222	0.00482605	0.773222
TAG 50:1;0	-0.0761376	-0.269311	0.117036	0.439816	0.791519	0.00195299	0.802421
TAG 51:3;0	0.0348824	-0.0538174	0.123582	0.440836	0	0.165189	0.802421
DAG 18:1;0_18:2;0	0.033723	-0.0549859	0.122432	0.456219	0	0.340832	0.812892
PC 18:0;0_20:3;0	-0.0575207	-0.208966	0.0939248	0.456624	0.664226	0.014664	0.812892
CE 18:3;0	0.0474192	-0.0803573	0.175196	0.467004	0.520826	0.0410525	0.822332
PC 16:0;0_20:2;0	-0.060181	-0.225825	0.105463	0.476412	0.717682	0.00777659	0.822851
TAG 48:3;0	0.0366258	-0.0645423	0.137794	0.477974	0.23464	0.105981	0.822851
CE 15:0;0	0.0316939	-0.0567657	0.120153	0.482536	0	0.428592	0.822851
PC 18:0;0_18:3;0	-0.0298159	-0.118088	0.0584558	0.507955	0	0.683671	0.849143
TAG 49:1;0	-0.0459438	-0.182118	0.0902303	0.508438	0.577992	0.029482	0.849143
TAG 56:7;0	0.0289312	-0.0597458	0.117608	0.522534	0.00244707	0.156791	0.861542
CE 17:1;0	-0.0433515	-0.177505	0.0908018	0.526498	0.570456	0.0309434	0.861542
TAG 53:3;0	0.0270319	-0.0617918	0.115856	0.550855	0	0.172548	0.892384
TAG 50:3;0	0.027314	-0.0651654	0.119793	0.562671	0.0816624	0.14001	0.893116
TAG 54:5;0	0.0258043	-0.0628854	0.114494	0.568506	0	0.162124	0.893116
PC 16:0;0_20:1;0	-0.0256527	-0.114087	0.0627813	0.569668	0	0.359769	0.893116
PE O-18:2;0/18:2;0	0.0288902	-0.0756396	0.13342	0.588026	0.2888	0.0935529	0.893116
PC O-16:1;0/18:2;0	-0.0239525	-0.111966	0.0640607	0.593758	0	0.548031	0.893116
CE 20:5;0	0.0406856	-0.108861	0.190232	0.593877	0.650205	0.0167953	0.893116
Cer 42:2;2	0.0312339	-0.0841829	0.146651	0.595834	0.41217	0.0651039	0.893116
LPE 18:2;0	-0.0243944	-0.115265	0.0664761	0.598779	0.0950131	0.137121	0.893116
TAG 58:8;0	0.0262645	-0.0721492	0.124678	0.600924	0.196201	0.114704	0.893116
DAG 16:0;0_18:2;0	0.0367536	-0.106467	0.179974	0.614984	0.618708	0.0220058	0.905704
TAG 52:3;0	0.0265572	-0.0791801	0.132294	0.62253	0.295954	0.0919028	0.908557
DAG 18:1;0_18:3;0	0.0233189	-0.0716338	0.118272	0.630278	0.137645	0.127783	0.911652
PC 18:0;0_22:6;0	-0.0339671	-0.181116	0.113181	0.65096	0.641502	0.0181789	0.921941
PC O-18:2;0/16:0;0	-0.0201519	-0.108614	0.0683106	0.655248	0	0.434999	0.921941
PC O-18:0;0/14:0;0	0.019669	-0.0688875	0.108225	0.663329	0	0.552907	0.921941
PC 14:0;0_18:2;0	-0.0395244	-0.218202	0.139153	0.664611	0.755531	0.00423313	0.921941
LPC 20:3;0	0.0422625	-0.150632	0.235157	0.667617	0.791402	0.00195872	0.921941
TAG 54:3;0	-0.022657	-0.127381	0.0820666	0.671537	0.282284	0.0950546	0.921941
SM 34:1;2	-0.0181894	-0.106131	0.0697527	0.685194	0	0.29163	0.923445
TAG 54:4;0	0.0179685	-0.070841	0.106778	0.691697	0	0.202209	0.923445
TAG 56:4;0	-0.0200108	-0.121948	0.0819267	0.700422	0.242817	0.104114	0.923445
DAG 18:1;0_18:1;0	-0.0173106	-0.108092	0.0734711	0.708602	0.0465886	0.147518	0.923445
PC 16:0;0_20:5;0	-0.0260447	-0.16632	0.11423	0.715929	0.601591	0.0250566	0.923445
Cer 40:1;2	0.022201	-0.0976432	0.142045	0.716544	0.455449	0.0553088	0.923445
TAG 48:1;0	-0.0293346	-0.187759	0.12909	0.716667	0.689186	0.0111911	0.923445
DAG 16:0;0_18:1;0	-0.0236876	-0.152595	0.10522	0.71873	0.526338	0.0398931	0.923445
TAG 46:1;0	-0.0265372	-0.180753	0.127679	0.735916	0.671986	0.0135388	0.923445
CE 22:6;0	0.0243299	-0.126769	0.175429	0.752312	0.660727	0.0151842	0.923445
SM 40:1;2	0.0293323	-0.158312	0.216977	0.759316	0.781191	0.00250027	0.923445
CE 20:4;0	-0.0209701	-0.15625	0.11431	0.761265	0.573966	0.03026	0.923445
Cer 40:2;2	0.0156602	-0.0854532	0.116774	0.761468	0.235963	0.105679	0.923445
PC 16:0;0_22:4;0	-0.0365892	-0.273647	0.200469	0.76226	0.861502	0.00014465	0.923445
TAG 50:2;0	-0.0200324	-0.153838	0.113774	0.769193	0.563493	0.0323127	0.923445
LPE 20:4;0	-0.0124491	-0.100489	0.0755905	0.781669	0	0.498451	0.923445
CE 20:3;0	-0.0248219	-0.200603	0.150959	0.781961	0.750364	0.0046477	0.923445
TAG 52:2;0	-0.0197259	-0.165904	0.126453	0.791406	0.633104	0.0195555	0.923445
DAG 16:1;0_18:1;0	0.0118749	-0.0763842	0.100134	0.792007	0	0.231131	0.923445
PC 16:0;0_22:5;0	-0.0156699	-0.133927	0.102587	0.795087	0.43792	0.0592516	0.923445
PC O-18:1;0/18:2;0	-0.0203643	-0.174116	0.133387	0.795176	0.671157	0.0136572	0.923445
TAG 46:2;0	-0.0181156	-0.156872	0.120641	0.798039	0.594033	0.0264477	0.923445
PC 18:0;0_22:5;0	-0.0149556	-0.137732	0.10782	0.811302	0.483098	0.0491798	0.932134
TAG 53:2;0	-0.0130955	-0.125363	0.0991716	0.819163	0.376183	0.0733655	0.934538
PC O-16:1;0/16:0;0	0.0104189	-0.0984738	0.119312	0.851245	0.342973	0.0810352	0.964347
PC 18:2;0_20:4;0	0.0202689	-0.220966	0.261504	0.869197	0.865449	0.000115533	0.967558
DAG 18:2;0_18:2;0	0.00716714	-0.0810745	0.0954087	0.873518	0	0.266715	0.967558
TAG 56:6;0	0.0103034	-0.118764	0.139371	0.875669	0.528576	0.0394248	0.967558
TAG 48:2;0	0.00953521	-0.118505	0.137575	0.883953	0.523248	0.040542	0.967558
PC 18:0;0_20:5;0	-0.0093804	-0.138958	0.120197	0.88717	0.532153	0.0386791	0.967558
Chol	0.00778816	-0.109172	0.124748	0.896162	0.428665	0.0613475	0.967558
PI 18:1;0_18:2;0	-0.00564699	-0.093809	0.0825151	0.900096	0	0.241253	0.967558
TAG 51:2;0	-0.00753398	-0.130479	0.115411	0.9044	0.481249	0.0495857	0.967558
SM 42:2;2	-0.00518419	-0.092949	0.0825807	0.907832	0	0.590924	0.967558
CE 18:1;0	-0.00958092	-0.190214	0.171052	0.917203	0.761193	0.00380426	0.968404
CE 18:2;0	0.00620141	-0.133487	0.14589	0.930662	0.606047	0.0242488	0.968404
PC 18:2;0_18:2;0	-0.0100628	-0.238424	0.218299	0.931175	0.851065	0.000247812	0.968404
PC O-16:0;0/16:0;0	-0.00335816	-0.0917526	0.0850363	0.940644	0	0.242828	0.968404
TAG 56:5;0	-0.00381739	-0.105937	0.098302	0.941594	0.247423	0.10306	0.968404
PC O-16:1;0/18:1;0	-0.00692686	-0.201921	0.188068	0.944493	0.804433	0.00138424	0.968404
TAG 58:7;0	0.00261127	-0.0860835	0.0913061	0.953985	0	0.258254	0.971984
TAG 49:2;0	0.00228233	-0.10351	0.108075	0.966273	0.299843	0.0910051	0.978351
LPC 16:1;0	0.0010326	-0.0866854	0.0887506	0.981593	0	0.675202	0.982788
CE 16:0;0	-0.00172996	-0.158892	0.155432	0.982788	0.684304	0.0118365	0.982788

## Sheet: MDH
MDH
Unadjusted model								Adjusted model
Variable	Effect	Lower	Upper	P-value	I2	Heterogeneity	P-value (FDR)	Effect	Lower	Upper	P-value	P-value (FDR)
TAG 48:0;0	-0.502357	-0.61505	-0.389664	2.39327e-18	0.287058	0.0939546	3.22846e-16	-0.194163	-0.306958	-0.0813674	0.000741301	0.00460933
TAG 56:5;0	-0.594883	-0.729221	-0.460545	3.98575e-18	0.501198	0.0452417	3.22846e-16	-0.181129	-0.291766	-0.0704929	0.00133304	0.00617007
TAG 50:1;0	-0.668601	-0.824273	-0.51293	3.83121e-17	0.635638	0.0191359	2.06885e-15	-0.251476	-0.361091	-0.141861	6.90797e-06	0.000175138
TAG 56:6;0	-0.536496	-0.662022	-0.410971	5.43421e-17	0.422416	0.0627677	2.20086e-15	-0.139658	-0.251369	-0.0279474	0.0142737	0.0355744
DAG 16:0;0_18:1;0	-0.633881	-0.782865	-0.484896	7.49022e-17	0.595753	0.0261289	2.42683e-15	-0.140769	-0.249689	-0.0318487	0.011307	0.0290751
TAG 52:2;0	-0.730502	-0.905275	-0.555728	2.56753e-16	0.713779	0.00820758	6.93234e-15	-0.202028	-0.308832	-0.0952242	0.000209373	0.0019952
TAG 52:3;0	-0.747439	-0.928196	-0.566681	5.2957e-16	0.732714	0.00622977	1.22558e-14	-0.159034	-0.277486	-0.0405822	0.00850197	0.0233444
TAG 54:3;0	-0.712233	-0.886213	-0.538254	1.02631e-15	0.708827	0.00877146	2.07828e-14	-0.146221	-0.252969	-0.0394735	0.00725898	0.0212953
DAG 18:1;0_18:3;0	-0.385301	-0.480551	-0.29005	2.22184e-15	0	0.218516	3.99931e-14	-0.0643702	-0.177969	0.0492287	0.266739	0.348482
TAG 56:3;0	-0.557919	-0.696214	-0.419625	2.63532e-15	0.52459	0.04026	4.26922e-14	-0.0734663	-0.183215	0.0362823	0.189517	0.271696
CE 22:6;0	0.370987	0.275639	0.466335	2.42166e-14	0	0.533917	3.56645e-13	0.0688655	-0.218007	0.355738	0.637997	0.675526
PC O-18:1;0/18:2;0	0.582099	0.43074	0.733459	4.78549e-14	0.609074	0.0237054	6.46041e-13	0.153107	0.0428574	0.263357	0.00649155	0.0194746
TAG 54:4;0	-0.685901	-0.864523	-0.507279	5.22511e-14	0.721536	0.00736279	6.5113e-13	-0.106611	-0.213395	0.000172417	0.0503711	0.0960013
PC O-18:2;0/16:0;0	0.68689	0.506505	0.867274	8.43246e-14	0.729664	0.00652895	9.75756e-13	0.147234	-0.0088385	0.303306	0.0644622	0.117336
TAG 53:2;0	-0.617871	-0.780603	-0.45514	9.93704e-14	0.660393	0.0152344	1.0732e-12	-0.133116	-0.242434	-0.0237985	0.0170027	0.0399195
DAG 18:1;0_18:1;0	-0.664248	-0.83985	-0.488647	1.22585e-13	0.7116	0.00845334	1.2081e-12	-0.131754	-0.239608	-0.0239007	0.0166522	0.0396715
TAG 56:4;0	-0.588021	-0.743565	-0.432478	1.26775e-13	0.625872	0.0207726	1.2081e-12	-0.110567	-0.220229	-0.000904637	0.0481398	0.092841
PC O-16:1;0/18:1;0	0.811609	0.596081	1.02714	1.57576e-13	0.826792	0.000678659	1.37934e-12	0.199724	0.0985464	0.300902	0.000109304	0.00116043
PC 16:0;0_22:6;0	0.359473	0.263967	0.454978	1.61775e-13	0	0.428825	1.37934e-12	0.106592	-0.133124	0.346307	0.383473	0.460987
PE 18:1;0_18:1;0	-0.359027	-0.454515	-0.26354	1.71464e-13	0	0.220008	1.38886e-12	-0.275177	-0.3912	-0.159153	3.34337e-06	0.000173187
TAG 50:2;0	-0.650489	-0.826869	-0.474109	4.88906e-13	0.714632	0.00811238	3.77156e-12	-0.237503	-0.349764	-0.125243	3.37464e-05	0.000653525
TAG 51:2;0	-0.623393	-0.792607	-0.454179	5.17576e-13	0.687113	0.0114631	3.81124e-12	-0.15887	-0.268502	-0.0492386	0.00450799	0.0146693
TAG 51:1;0	-0.554198	-0.705736	-0.402659	7.61862e-13	0.604331	0.0245588	5.18465e-12	-0.152491	-0.264011	-0.0409714	0.00736135	0.0212953
TAG 54:5;0	-0.653562	-0.832298	-0.474825	7.68096e-13	0.720634	0.00745864	5.18465e-12	-0.128754	-0.236992	-0.0205149	0.01973	0.0450177
DAG 18:2;0_18:2;0	-0.346204	-0.441814	-0.250594	1.27443e-12	0	0.835475	7.86755e-12	0.0363709	-0.0760132	0.148755	0.525883	0.594335
CE 20:5;0	0.347326	0.251405	0.443246	1.27496e-12	0	0.240875	7.86755e-12	-0.00191544	-0.115705	0.111874	0.973681	0.973681
TAG 52:4;0	-0.689669	-0.880238	-0.4991	1.31126e-12	0.756277	0.00417509	7.86755e-12	-0.134487	-0.26546	-0.00351471	0.0441609	0.0872447
DAG 18:1;0_18:2;0	-0.664727	-0.850332	-0.479121	2.228e-12	0.741546	0.00540612	1.28906e-11	-0.0717583	-0.185161	0.0416439	0.214894	0.30272
TAG 53:3;0	-0.629045	-0.805749	-0.452341	3.01051e-12	0.711711	0.00844074	1.68173e-11	-0.0871171	-0.195376	0.0211417	0.114748	0.178743
TAG 48:1;0	-0.54283	-0.696902	-0.388759	5.00546e-12	0.618203	0.0220937	2.70295e-11	-0.225602	-0.338283	-0.11292	8.70652e-05	0.00100747
SM 38:2;2	0.361752	0.258331	0.465173	7.09806e-12	0.141465	0.126939	3.70931e-11	-0.170398	-0.280889	-0.0599082	0.0025056	0.00960285
CE 20:2;0	0.34564	0.244768	0.446512	1.86956e-11	0.0975537	0.136569	9.46466e-11	0.0141286	-0.0996863	0.127944	0.80777	0.82822
TAG 49:2;0	-0.488167	-0.631529	-0.344804	2.4906e-11	0.553751	0.0342575	1.22266e-10	-0.127351	-0.240159	-0.0145441	0.0269212	0.0589355
DAG 16:0;0_18:2;0	-0.670536	-0.869745	-0.471327	4.18916e-11	0.777077	0.00274194	1.96728e-10	-0.109864	-0.270854	0.0511263	0.18105	0.261876
TAG 49:1;0	-0.494686	-0.641699	-0.347672	4.25031e-11	0.576036	0.0298592	1.96728e-10	-0.115823	-0.228171	-0.00347389	0.0433246	0.0867079
TAG 46:1;0	-0.437737	-0.568583	-0.306891	5.49207e-11	0.462445	0.0537467	2.44026e-10	-0.193053	-0.307508	-0.0785981	0.000946708	0.00511222
PC O-16:0;0/16:1;0	0.319928	0.224265	0.415591	5.57344e-11	0	0.529084	2.44026e-10	-0.0705292	-0.183565	0.0425068	0.221357	0.306495
TAG 53:4;0	-0.566241	-0.736859	-0.395623	7.78662e-11	0.687297	0.0114388	3.31956e-10	-0.0444788	-0.153871	0.0649134	0.425498	0.503143
PE 18:0;0_20:4;0	-0.315664	-0.411602	-0.219726	1.12702e-10	0	0.160153	4.68146e-10	-0.268012	-0.412583	-0.12344	0.000279654	0.00238442
TAG 51:3;0	-0.622809	-0.812326	-0.433292	1.18679e-10	0.749807	0.00469372	4.80649e-10	-0.094232	-0.202907	0.0144431	0.0892285	0.150573
TAG 52:5;0	-0.610979	-0.797206	-0.424751	1.27377e-10	0.74008	0.00553836	5.03293e-10	-0.138368	-0.248348	-0.0283871	0.0136689	0.0345993
TAG 56:7;0	-0.422393	-0.551266	-0.29352	1.32773e-10	0.442715	0.0581692	5.07563e-10	-0.0917561	-0.221256	0.0377434	0.164918	0.245107
PC O-18:2;0/18:2;0	0.487119	0.338447	0.635792	1.34723e-10	0.587325	0.0277034	5.07563e-10	0.0511967	-0.0601767	0.16257	0.367606	0.447761
TAG 50:3;0	-0.646094	-0.844611	-0.447576	1.78389e-10	0.773601	0.00295675	6.56796e-10	-0.195262	-0.319568	-0.0709574	0.00207854	0.00821276
SM 34:2;2	0.444547	0.306689	0.582404	2.6112e-10	0.514817	0.0423251	9.40032e-10	-0.15248	-0.260639	-0.0443206	0.00572551	0.0178372
PE 18:0;0_18:2;0	-0.346538	-0.456176	-0.236901	5.82825e-10	0.232311	0.106512	2.05256e-09	-0.212308	-0.328186	-0.0964305	0.000329421	0.00266831
TAG 48:2;0	-0.52517	-0.691692	-0.358648	6.35905e-10	0.671813	0.0135635	2.18619e-09	-0.195292	-0.308273	-0.0823118	0.000704314	0.00460933
PC 18:2;0_20:4;0	0.386988	0.264223	0.509752	6.47759e-10	0.381877	0.0720539	2.18619e-09	-0.0916432	-0.203397	0.0201109	0.107998	0.173346
PC O-16:1;0/18:2;0	0.743794	0.507612	0.979976	6.72656e-10	0.846629	0.000304866	2.22388e-09	0.0992477	-0.0191458	0.217641	0.100381	0.164259
PC 16:0;0_20:5;0	0.300379	0.204161	0.396597	9.43186e-10	0	0.314886	3.05592e-09	-0.0527666	-0.166524	0.0609903	0.363277	0.447761
PC O-16:0;0/18:2;0	0.650693	0.44157	0.859817	1.07084e-09	0.797815	0.00166003	3.40148e-09	0.13536	-0.0133515	0.284072	0.0744243	0.133964
PC 18:1;0_20:4;0	0.297544	0.201283	0.393805	1.376e-09	0	0.233721	4.28678e-09	-0.185851	-0.297753	-0.0739491	0.0011332	0.00592189
TAG 58:7;0	-0.426123	-0.56518	-0.287067	1.90044e-09	0.519844	0.0412598	5.80889e-09	-0.0920538	-0.205659	0.0215512	0.112252	0.178282
TAG 54:6;0	-0.563633	-0.750523	-0.376743	3.4012e-09	0.739945	0.00555071	1.02036e-08	-0.121763	-0.232692	-0.0108333	0.0314467	0.0670312
TAG 50:4;0	-0.602772	-0.805969	-0.399574	6.09614e-09	0.781504	0.00248246	1.79559e-08	-0.168626	-0.279677	-0.0575752	0.00291919	0.0104345
SM 36:2;2	0.284682	0.188548	0.380817	6.47436e-09	0	0.247873	1.84951e-08	-0.178753	-0.291499	-0.0660063	0.00188737	0.00783984
PC 16:1;0_18:1;0	0.283154	0.187521	0.378786	6.50754e-09	0	0.614488	1.84951e-08	-0.176592	-0.287948	-0.0652352	0.00188258	0.00783984
TAG 48:3;0	-0.517588	-0.699543	-0.335633	2.47088e-08	0.724261	0.00707731	6.90144e-08	-0.163884	-0.276756	-0.0510113	0.00443075	0.0146693
DAG 16:1;0_18:1;0	-0.441987	-0.598139	-0.285835	2.89534e-08	0.623433	0.0211894	7.94991e-08	-0.164003	-0.296052	-0.0319536	0.0149231	0.0366294
PC O-17:0;0/17:1;0	0.398078	0.255354	0.540802	4.58653e-08	0.545847	0.035859	1.23836e-07	0.0402838	-0.0736993	0.154267	0.488505	0.557308
PC 18:0;0_20:5;0	0.267695	0.171233	0.364158	5.35383e-08	0	0.901596	1.42184e-07	-0.0862167	-0.200334	0.0279001	0.138666	0.211923
PC O-18:2;0/18:1;0	0.528273	0.33768	0.718865	5.55677e-08	0.750287	0.004654	1.45193e-07	0.103078	-0.0469827	0.253138	0.178201	0.260077
PC O-18:1;0/20:4;0	0.392647	0.249316	0.535977	7.9073e-08	0.548018	0.035417	2.0333e-07	0.0961691	-0.018423	0.210761	0.0999986	0.164259
TAG 46:2;0	-0.425322	-0.582892	-0.267752	1.22015e-07	0.627486	0.0204987	3.08849e-07	-0.15251	-0.267097	-0.0379233	0.00909058	0.0245446
TAG 58:8;0	-0.257617	-0.353747	-0.161487	1.50069e-07	0	0.217754	3.74018e-07	-0.0213994	-0.136714	0.0939146	0.716066	0.741464
TAG 51:4;0	-0.503076	-0.692208	-0.313944	1.85465e-07	0.743	0.00527665	4.55232e-07	-0.0328196	-0.14394	0.0783004	0.56267	0.624333
PC O-18:1;0/16:0;0	0.575157	0.352895	0.797418	3.93889e-07	0.81769	0.000925823	9.52388e-07	0.160276	-0.0023586	0.322911	0.0534163	0.0994649
PE 16:0;0_18:2;0	-0.246712	-0.342658	-0.150765	4.66164e-07	0	0.294561	1.11057e-06	-0.200069	-0.316663	-0.0834755	0.000770447	0.00460933
PC O-16:0;0/18:1;0	0.596335	0.364015	0.828655	4.8799e-07	0.833506	0.000528472	1.14572e-06	0.144354	-0.0155916	0.3043	0.0769097	0.136916
PC O-16:1;0/20:4;0	0.582396	0.355057	0.809735	5.13944e-07	0.827023	0.000673054	1.18941e-06	0.0965721	-0.0135214	0.206666	0.0855695	0.145918
TAG 50:5;0	-0.485316	-0.680694	-0.289939	1.12424e-06	0.759098	0.00395988	2.56516e-06	-0.15095	-0.264624	-0.0372761	0.00924993	0.0245654
PC 16:0;0_22:5;0	0.303649	0.180985	0.426313	1.22353e-06	0.375199	0.0735923	2.75294e-06	-0.0662109	-0.179927	0.0475055	0.253795	0.337006
PC O-16:0;0/20:4;0	0.334819	0.198809	0.470828	1.40065e-06	0.495217	0.0465357	3.1083e-06	0.0493225	-0.0659235	0.164569	0.401572	0.478343
PC O-18:0;0/14:0;0	0.318282	0.18867	0.447894	1.48691e-06	0.442632	0.058188	3.25512e-06	0.24193	0.125463	0.358398	4.67508e-05	0.000693484
PC 18:1;0_18:1;0	0.262412	0.154904	0.36992	1.71829e-06	0.192649	0.115505	3.71151e-06	-0.09379	-0.265882	0.0783019	0.28544	0.366994
PC 18:1;0_18:2;0	0.314572	0.185272	0.443871	1.85712e-06	0.446041	0.0574201	3.9586e-06	-0.0998208	-0.266006	0.0663643	0.239087	0.322767
PC O-16:0;0/20:3;0	0.282498	0.164382	0.400614	2.76355e-06	0.330399	0.0839431	5.81421e-06	-0.0296463	-0.144229	0.0849367	0.612081	0.65667
PC 18:2;0_18:2;0	0.336332	0.195391	0.477273	2.90941e-06	0.531168	0.0388842	6.04261e-06	-0.0407759	-0.194905	0.113353	0.604094	0.656289
PC O-18:0;0/20:4;0	0.320308	0.184	0.456615	4.11089e-06	0.497795	0.045977	8.42992e-06	0.0416227	-0.073229	0.156474	0.477519	0.552558
TAG 52:6;0	-0.453111	-0.646742	-0.25948	4.50833e-06	0.752777	0.00445139	9.12936e-06	-0.108188	-0.240147	0.0237698	0.108073	0.173346
TAG 54:7;0	-0.402821	-0.578602	-0.227041	7.07289e-06	0.697665	0.0101114	1.41458e-05	-0.0872205	-0.231646	0.0572054	0.236553	0.322031
TAG 56:8;0	-0.328032	-0.472912	-0.183152	9.09288e-06	0.553813	0.034245	1.78453e-05	-0.050529	-0.207576	0.106518	0.528298	0.594335
SM 32:1;2	0.460437	0.257025	0.663849	9.14297e-06	0.779335	0.00260761	1.78453e-05	-0.0290584	-0.138946	0.0808291	0.604257	0.656289
SM 40:2;2	0.444844	0.247022	0.642666	1.04627e-05	0.766836	0.00340312	2.01781e-05	-0.177445	-0.284811	-0.0700788	0.00119844	0.00599253
PC 16:0;0_18:2;0	0.213342	0.115316	0.311367	1.99317e-05	0.0343676	0.150105	3.79874e-05	-0.134098	-0.262899	-0.00529719	0.0412934	0.0846777
SM 34:1;2	0.610915	0.322728	0.899102	3.25508e-05	0.894136	1.38314e-05	6.13167e-05	0.0837135	-0.104822	0.272248	0.384156	0.460987
PC 16:0;0_20:1;0	0.203836	0.107364	0.300309	3.45494e-05	0	0.22007	6.43333e-05	-0.0412919	-0.156953	0.0743687	0.484099	0.556199
PE O-18:1;0/18:2;0	0.359099	0.179051	0.539147	9.26517e-05	0.714974	0.00807432	0.000170563	0.0401282	-0.113067	0.193324	0.607675	0.656289
PC 16:0;0_18:1;0	0.190842	0.0945399	0.287144	0.000102725	0	0.430512	0.000186983	-0.187078	-0.301103	-0.0730531	0.00130141	0.00617007
PC 17:0;0_20:4;0	0.19117	0.0943736	0.287966	0.000108446	0	0.57062	0.000195203	-0.174862	-0.289958	-0.0597666	0.00290392	0.0104345
PC 14:0;0_18:1;0	0.189342	0.0929011	0.285782	0.000119089	0	0.674201	0.000212004	-0.113493	-0.228336	0.00135088	0.0527564	0.0993784
PE O-18:2;0/20:4;0	0.311229	0.148287	0.47417	0.000181361	0.647951	0.0171493	0.000319353	-0.0328091	-0.147627	0.0820092	0.575442	0.63416
PE 16:0;0_20:4;0	-0.181585	-0.277935	-0.0852353	0.0002209	0	0.167715	0.00038242	-0.245301	-0.376791	-0.113811	0.000255774	0.00230197
CE 20:4;0	0.187997	0.0882139	0.28778	0.000221898	0.0640273	0.1438	0.00038242	-0.169945	-0.295571	-0.0443191	0.0080156	0.0227384
PC 14:0;0_18:2;0	0.181611	0.0850849	0.278137	0.000226364	0	0.802345	0.000386011	-0.193087	-0.307361	-0.0788136	0.000927187	0.00511222
PE O-18:2;0/18:1;0	0.320157	0.1484	0.491914	0.000258802	0.683457	0.0119501	0.000436728	-0.0976672	-0.210936	0.0156017	0.0910285	0.152027
PC 16:0;0_18:3;0	0.178793	0.0823212	0.275264	0.000280747	0	0.43648	0.000468877	-0.231693	-0.345061	-0.118326	6.1843e-05	0.000834881
CE 15:0;0	0.258384	0.117895	0.398873	0.000312495	0.523251	0.0405414	0.000516573	0.0360914	-0.0796471	0.15183	0.541076	0.604512
PC 16:1;0_18:2;0	0.227611	0.101956	0.353266	0.000384822	0.41319	0.0648709	0.000629709	-0.192986	-0.331181	-0.0547907	0.00619955	0.0189496
SM 42:2;2	0.452984	0.202316	0.703652	0.000397313	0.856347	0.000190515	0.000641652	-0.0125235	-0.15826	0.133213	0.866249	0.882594
PC 18:0;0_18:3;0	0.174164	0.0777376	0.270591	0.000400042	0	0.376246	0.000641652	-0.196618	-0.310628	-0.0826086	0.000724582	0.00460933
PE O-18:1;0/20:4;0	0.315148	0.139636	0.490659	0.000432673	0.696849	0.0102129	0.000687187	-0.0568246	-0.171116	0.0574668	0.32982	0.420716
PC 16:0;0_18:0;0	0.171985	0.0757051	0.268265	0.000463359	0	0.194786	0.000728778	-0.205047	-0.319462	-0.0906328	0.000443854	0.00342402
PC 17:0;0_18:1;0	0.214799	0.0874021	0.342195	0.000951042	0.41627	0.0641679	0.00148143	-0.136283	-0.251356	-0.0212103	0.0202747	0.045618
PC 18:0;0_20:3;0	-0.160875	-0.256956	-0.0647939	0.00103184	0	0.195065	0.00159198	-0.381583	-0.565356	-0.19781	4.70884e-05	0.000693484
PE O-18:2;0/18:2;0	0.29646	0.118271	0.474648	0.00111071	0.706273	0.00906971	0.0016975	-0.0372696	-0.22269	0.148151	0.693615	0.72494
PC O-18:1;0/20:3;0	0.230823	0.0915711	0.370075	0.00115883	0.516241	0.0420228	0.00175449	-0.0704332	-0.248574	0.107708	0.438383	0.510921
PC 16:0;0_16:0;0	0.324621	0.128022	0.52122	0.00121106	0.756628	0.00414795	0.00181659	-0.0103696	-0.143966	0.123227	0.879084	0.890072
LPC 18:2;0	0.405249	0.15389	0.656608	0.00157816	0.855066	0.0002034	0.00234552	0.244476	0.023341	0.465611	0.030247	0.0653336
PC 16:0;0_20:2;0	0.224813	0.0851665	0.364459	0.00160337	0.519472	0.0413384	0.00236132	-0.145628	-0.270707	-0.0205487	0.0224919	0.0499134
PC 17:0;0_18:2;0	0.198568	0.0747921	0.322343	0.00166493	0.388729	0.0704771	0.0024299	-0.106989	-0.227282	0.0133041	0.0812992	0.142192
PI 18:1;0_18:1;0	0.151309	0.0548157	0.247802	0.00211651	0	0.225593	0.00306137	-0.0813936	-0.197283	0.034496	0.16865	0.248375
PC 18:0;0_22:6;0	0.204877	0.0734332	0.336322	0.00225116	0.457044	0.0549521	0.00322732	0.00727601	-0.296495	0.311047	0.962557	0.968535
PE O-16:1;0/20:4;0	0.195327	0.0682428	0.32241	0.00259151	0.415817	0.0642713	0.00368267	-0.101871	-0.217688	0.0139463	0.0847167	0.145918
PC 16:0;0_20:4;0	0.146866	0.0500509	0.24368	0.00294694	0	0.217159	0.00415134	-0.226231	-0.34118	-0.111281	0.00011461	0.00116043
SM 36:1;2	0.218295	0.0720411	0.364549	0.0034402	0.560487	0.0329092	0.00480441	-0.149716	-0.264043	-0.0353881	0.010269	0.0268319
LPC 16:1;0	0.219602	0.0672455	0.371959	0.00472762	0.599939	0.0253584	0.00654594	-0.0257214	-0.140753	0.0893101	0.661202	0.69555
CE 17:1;0	0.268044	0.0808626	0.455226	0.00500566	0.734332	0.00607405	0.00687217	-0.117126	-0.230755	-0.00349703	0.043354	0.0867079
PC O-16:1;0/18:0;0	0.145137	0.0380858	0.252189	0.00787784	0.186071	0.116986	0.0107245	0.0902293	-0.056211	0.23667	0.227188	0.311902
LPC 18:1;0	0.4391	0.112053	0.766146	0.00850113	0.915093	1.21381e-06	0.0114765	0.170037	0.0121491	0.327926	0.0347914	0.072259
PC O-16:0;0/16:0;0	0.288548	0.0727007	0.504395	0.00879015	0.798989	0.00160874	0.0117686	0.182426	0.0595483	0.305304	0.00361671	0.0124661
PC O-16:1;0/16:0;0	0.391659	0.0964433	0.686875	0.00931533	0.894398	1.34966e-05	0.0123695	0.175593	0.0511373	0.300048	0.00568722	0.0178372
CE 14:0;0	0.20414	0.0490304	0.35925	0.00989403	0.606123	0.0242352	0.0130312	-0.0645497	-0.180406	0.0513067	0.274834	0.356184
CE 17:0;0	0.30087	0.0683662	0.533374	0.0112038	0.827278	0.000666895	0.0146372	0.0743024	-0.113004	0.261609	0.436866	0.510921
CE 18:2;0	0.268097	0.0525062	0.483688	0.0147972	0.801169	0.00151622	0.0191772	-0.0896517	-0.27267	0.0933668	0.33701	0.426529
Cer 40:1;2	-0.119228	-0.215901	-0.0225541	0.0156392	0	0.159853	0.0201075	-0.193458	-0.310703	-0.0762128	0.0012207	0.00599253
SM 34:0;2	0.259099	0.0422831	0.475915	0.0191708	0.801444	0.00150479	0.0244541	-0.0363661	-0.234159	0.161427	0.718579	0.741464
LPE 20:4;0	0.216571	0.0314621	0.40168	0.0218428	0.726932	0.00680327	0.0276448	0.0290723	-0.0871054	0.14525	0.623807	0.664847
PC 18:0;0_22:5;0	0.111895	0.0152465	0.208543	0.0232589	0	0.358081	0.0292089	-0.184772	-0.300265	-0.0692788	0.00171471	0.00771619
LPE 18:2;0	0.192736	0.0241446	0.361327	0.0250482	0.681522	0.0122117	0.0312139	0.10669	-0.0398263	0.253206	0.153521	0.230282
PC 18:1;0_20:3;0	0.12197	0.0138362	0.230104	0.0270532	0.199459	0.113969	0.033276	-0.266549	-0.380644	-0.152453	4.67541e-06	0.000173187
PC 18:0;0_18:2;0	0.134702	0.0152333	0.254172	0.0271138	0.342773	0.0810815	0.033276	-0.180801	-0.295608	-0.0659928	0.00202479	0.00820038
LPC 20:4;0	0.239678	0.0232779	0.456079	0.0299467	0.798829	0.00161567	0.0364764	0.0942406	-0.0224549	0.210936	0.113462	0.178455
CE 16:1;0	0.102533	0.00634932	0.198716	0.0366765	0	0.187709	0.0443403	-0.241168	-0.355624	-0.126712	3.6307e-05	0.000653525
CE 16:0;0	0.230407	0.0116595	0.449155	0.0389767	0.803336	0.00142772	0.0467721	-0.0729429	-0.224525	0.0786391	0.345601	0.43401
PC 18:0;0_20:4;0	0.0994741	0.00267	0.196278	0.0440071	0	0.569879	0.0524203	-0.221043	-0.384765	-0.0573209	0.00814092	0.0227384
CE 18:3;0	0.14578	0.00167236	0.289888	0.0473999	0.542806	0.0364803	0.0560495	-0.265419	-0.379732	-0.151106	5.34529e-06	0.000173187
CE 18:1;0	0.20278	0.00102549	0.404535	0.0488468	0.76814	0.00331415	0.0573419	-0.176829	-0.291686	-0.0619719	0.00254891	0.00960285
PC 16:0;0_22:4;0	0.0955449	-0.0012943	0.192384	0.0531416	0.000505104	0.157194	0.0619349	-0.184543	-0.30061	-0.0684758	0.00183149	0.00783984
PC 18:0;0_18:1;0	0.0929673	-0.00348327	0.189418	0.0588676	0	0.413623	0.0681182	-0.231343	-0.346361	-0.116325	8.07424e-05	0.00100617
PI 16:0;0_18:2;0	-0.116628	-0.245487	0.0122303	0.0760733	0.459912	0.0543115	0.0874034	-0.203454	-0.318361	-0.0885473	0.00051985	0.00382799
PC 16:0;0_16:1;0	0.08207	-0.0140123	0.178152	0.0941052	0	0.297316	0.107359	-0.219942	-0.34847	-0.0914132	0.000796675	0.00460933
Chol	0.125275	-0.0516547	0.302204	0.165213	0.696767	0.0102231	0.187164	-0.104018	-0.239333	0.0312964	0.1319	0.203503
LPC 18:0;0	0.215827	-0.129503	0.561158	0.220593	0.92213	4.02202e-07	0.247564	0.112535	-0.0805124	0.305582	0.253229	0.337006
LPC 16:0;0	0.205688	-0.124127	0.535504	0.221585	0.913943	1.42969e-06	0.247564	0.127172	-0.0749761	0.32932	0.217568	0.303845
LPC 20:3;0	0.131527	-0.0994046	0.362459	0.264295	0.823155	0.000771177	0.293258	-0.0876451	-0.23956	0.0642697	0.25815	0.340003
PI 18:0;0_18:1;0	0.0599533	-0.0687207	0.188627	0.361132	0.42966	0.0611219	0.397982	-0.130864	-0.26739	0.00566262	0.0602893	0.110987
CE 18:0;0	-0.0903997	-0.294009	0.113209	0.384193	0.770544	0.0031538	0.420535	-0.10316	-0.324262	0.117942	0.360472	0.447761
PC 16:0;0_20:3;0	-0.0416944	-0.138068	0.0546788	0.396466	0	0.23257	0.431057	-0.316684	-0.441461	-0.191908	6.54446e-07	0.00010602
SM 40:1;2	0.0692077	-0.120886	0.259302	0.475495	0.740118	0.00553495	0.513534	-0.262105	-0.376849	-0.147361	7.5677e-06	0.000175138
PI 18:1;0_18:2;0	0.0542227	-0.11132	0.219766	0.520889	0.655093	0.0160383	0.558835	-0.128353	-0.302953	0.046246	0.149633	0.226547
PI 16:0;0_18:1;0	-0.0308687	-0.127103	0.0653654	0.529551	0	0.203524	0.56439	-0.138807	-0.255387	-0.0222275	0.0196137	0.0450177
PC 17:0;0_20:3;0	-0.022611	-0.119068	0.0738457	0.645913	0	0.302368	0.683908	-0.298505	-0.426774	-0.170235	5.08687e-06	0.000173187
PI 18:0;0_20:3;0	-0.0381318	-0.203692	0.127429	0.651688	0.656021	0.0158964	0.685542	-0.168909	-0.285525	-0.0522932	0.00452757	0.0146693
PC 16:0;0_17:1;0	-0.0202299	-0.11685	0.0763907	0.681537	0	0.426334	0.712317	-0.127447	-0.244652	-0.0102415	0.0330704	0.0695766
Cer 42:2;2	0.0355086	-0.152254	0.223271	0.710892	0.729686	0.00652671	0.738234	-0.0793224	-0.251813	0.0931686	0.36742	0.447761
Cer 40:2;2	-0.0176911	-0.170401	0.135019	0.82038	0.592345	0.0267619	0.846506	-0.128996	-0.27419	0.0161975	0.0816285	0.142192
LPE 18:1;0	0.0176493	-0.142308	0.177607	0.828788	0.632973	0.0195775	0.84977	-0.0746574	-0.19147	0.0421554	0.210333	0.298894
Cer 42:1;2	0.00679918	-0.112492	0.12609	0.911052	0.334475	0.0830005	0.928242	-0.145015	-0.262086	-0.0279438	0.0151912	0.0367309
PI 18:0;0_20:4;0	-0.0065971	-0.170115	0.15692	0.936973	0.642509	0.0180165	0.948686	-0.177404	-0.294415	-0.0603931	0.00296288	0.0104345
CE 20:3;0	0.00234173	-0.114574	0.119258	0.968686	0.31425	0.087677	0.974703	-0.3252	-0.512554	-0.137846	0.000668919	0.00460933
PI 18:0;0_18:2;0	0.00189047	-0.130193	0.133974	0.97762	0.458254	0.0546817	0.97762	-0.122303	-0.241785	-0.00282123	0.0448303	0.0875001
